# Supplementary material for: Analyses of gut microbiota and plasma bile acids enable stratification of patients for antidiabetic treatment
Source: PubMed Central journal article supplement (PMC5702614; doi:10.1038/s41467-017-01682-2), 2017-11-27
Supplement: 41467_2017_1682_MOESM1_ESM.pdf [file 41467_2017_1682_MOESM1_ESM.pdf]

1

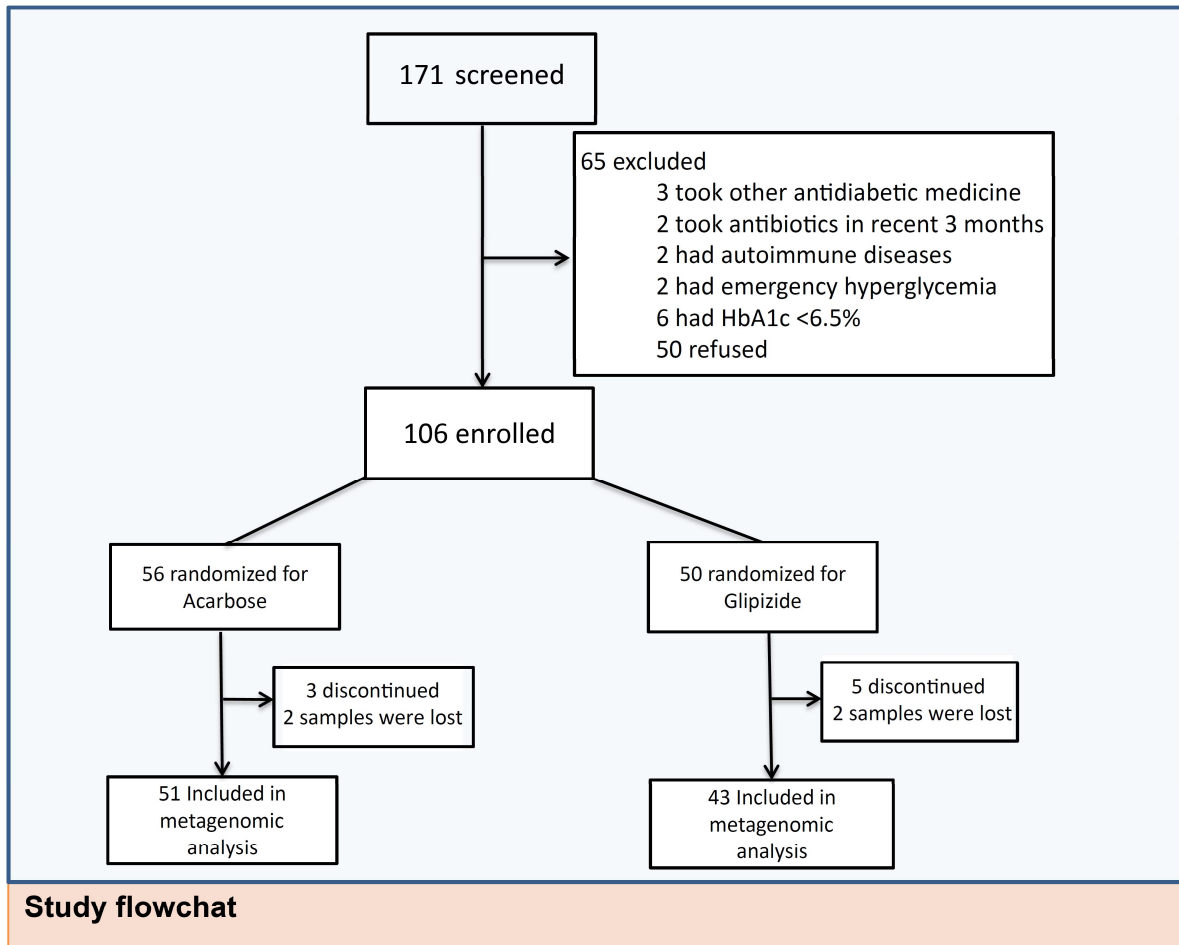

2

3

**Supplementary Figure 1. Flow chart of the clinical trial**

4

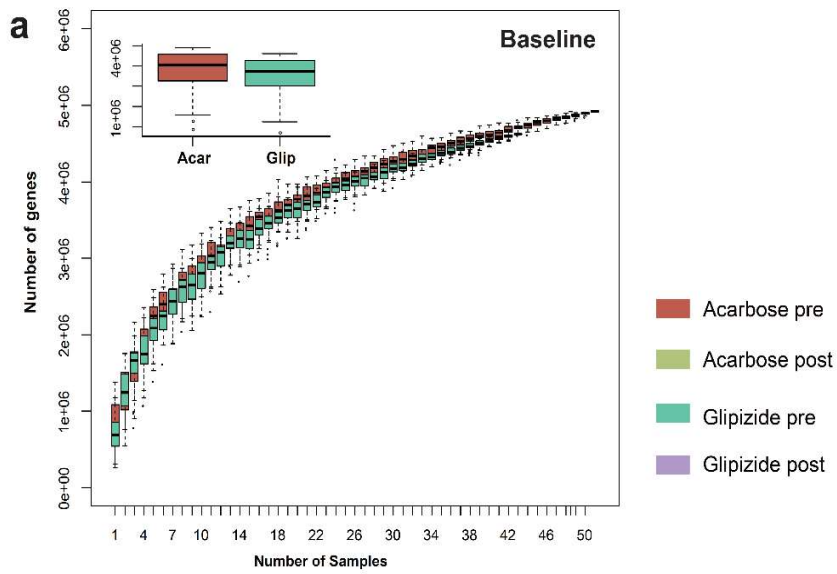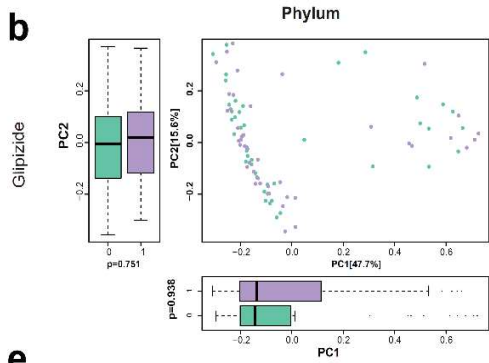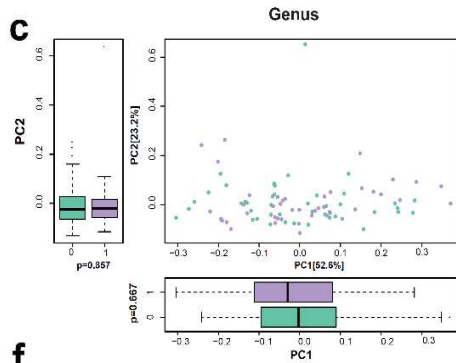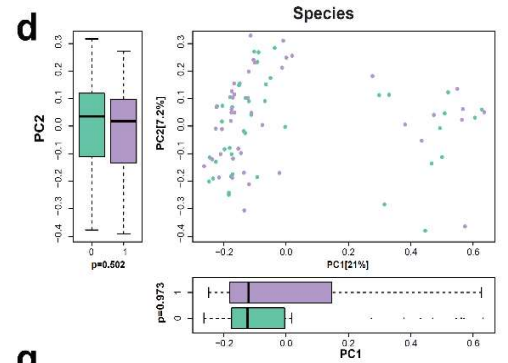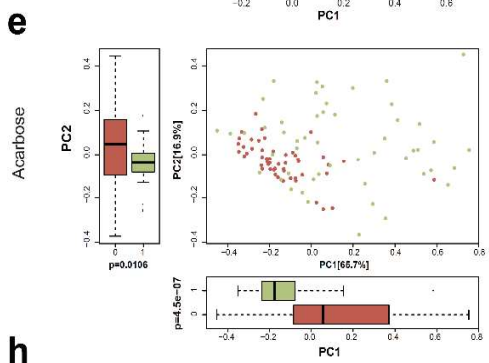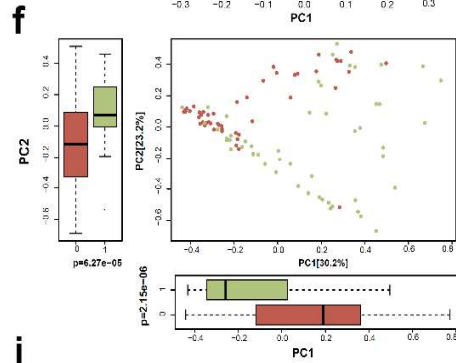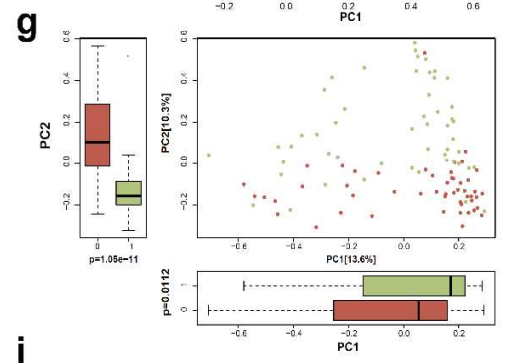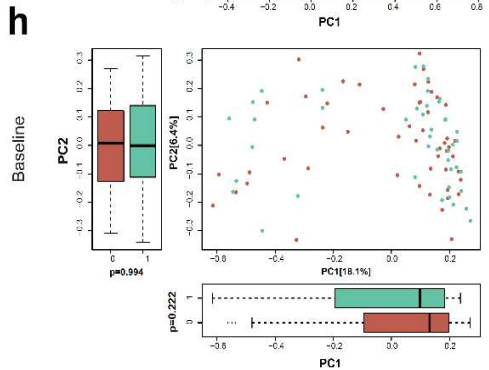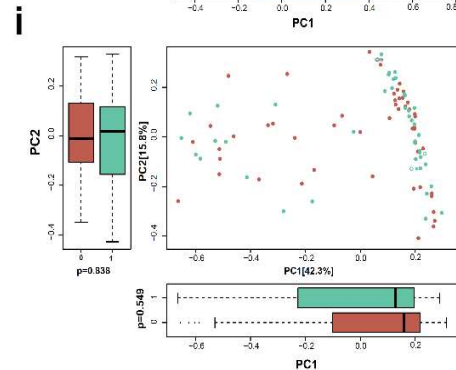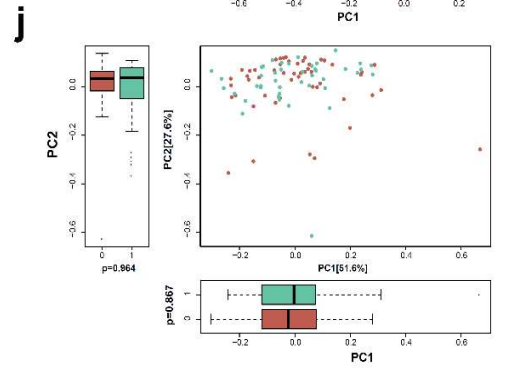

6 **Supplementary Figure 2. Metagenomic analysis comparing the two therapeutic arms**  
7 **before and after treatment. (a)** Rarefaction curves of gut microbial gene content at baseline in  
8 both treatment arms. The number of genes in each group was calculated after 100 random  
9 samplings with replacement. Plotted boxes are interquartile ranges. Dark lines in the boxes  
10 represent medians, the lowest and highest values within 1.5 times IQR from the first and third  
11 quartiles (whiskers above and below the boxes). Outliers are shown as circles beyond the  
12 whiskers. PCA analysis of taxonomic differences based on profiles at the phylum (**b, e, and h**),  
13 genus (**c, f, and i**) and species (**d, g, and j**) levels. PCAs of samples collected to show the effects  
14 of Glipizide on taxonomy in **b, c, and d**; effects of Acarbose on taxonomy in **e, f, and g**; and  
15 baseline comparison of both treatment arms in **h, i, and j**. The *P* values were calculated based on  
16 Wilcoxon rank-sum test. Acarbose n=51, Glipizide n=43.

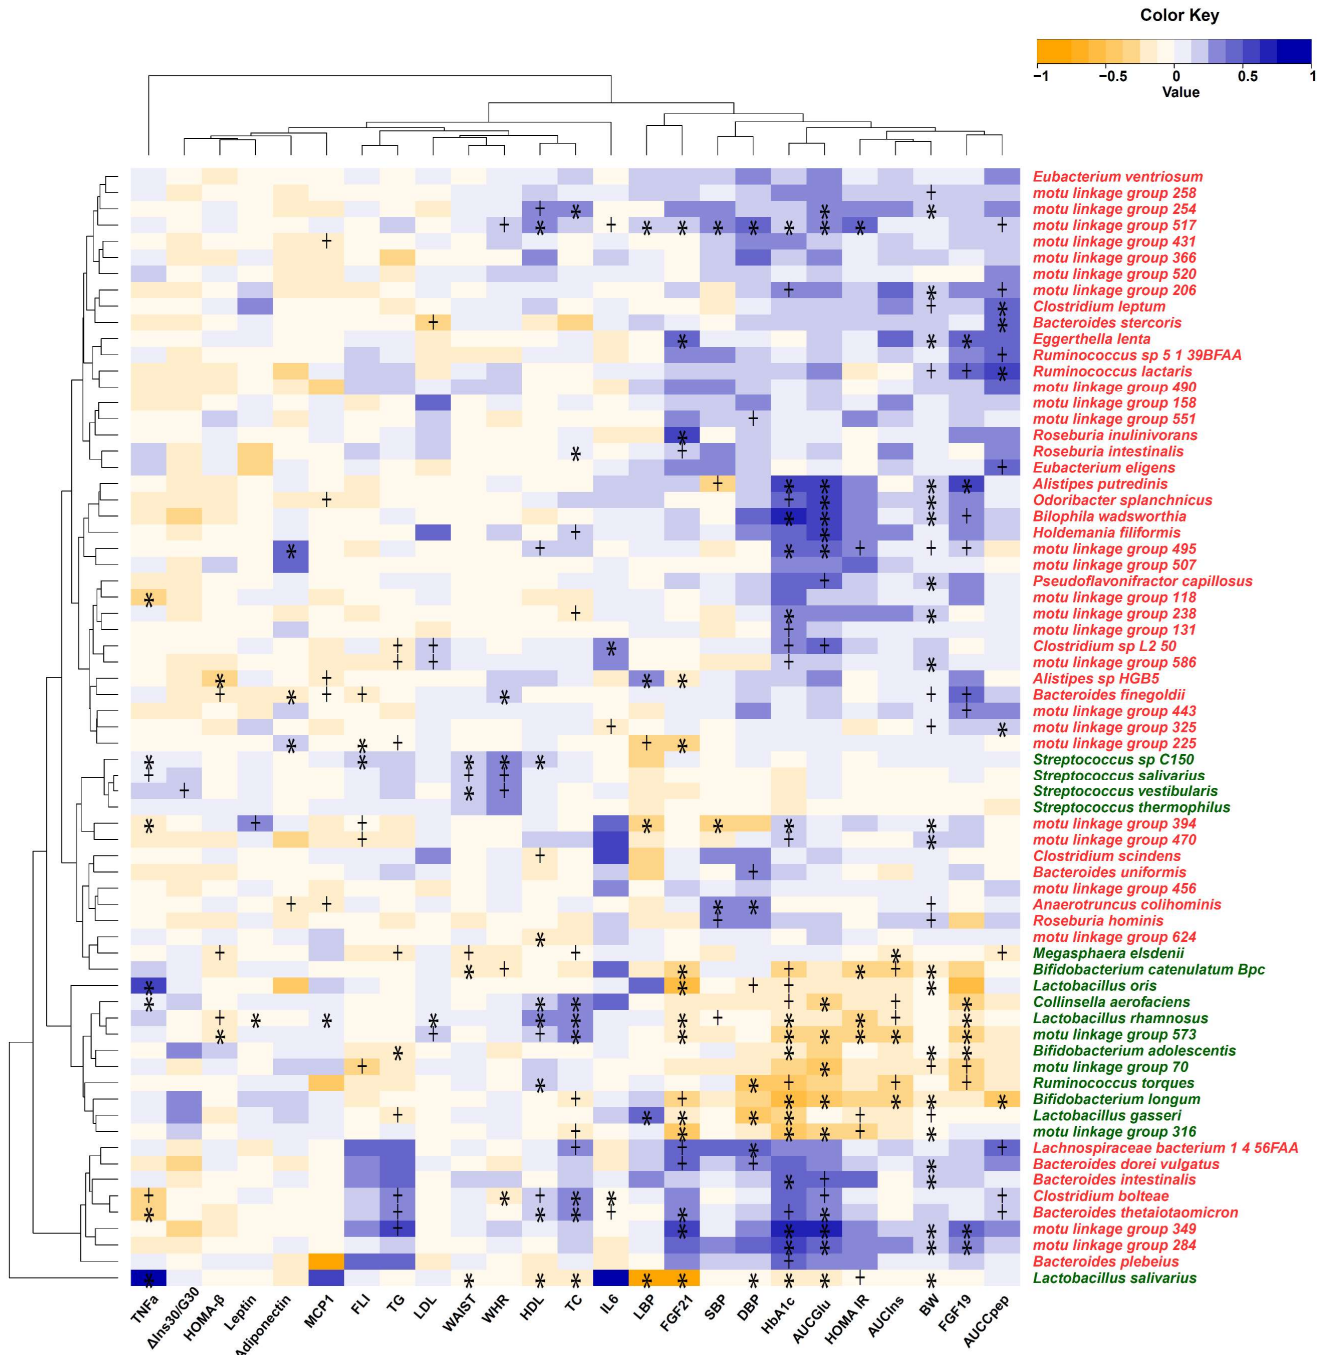

18 **Supplementary Figure 3. Correlation between clinical outcomes and mOTUs that exhibit**  
 19 **changes in relative abundance in response to Acarbose treatment.** Multivariate longitudinal  
 20 analysis of the contribution of changes of mOTUs to alterations in clinical outcomes. The colour  
 21 key indicates the  $\beta$  coefficient value of independent variables. mOTUs in green indicate those

22 with increased relative abundances after Acarbose treatment; mOTUs in red indicate those with  
23 decreased relative abundances after Acarbose treatment; +  $q < 0.05$ ; \*  $q < 0.01$ . BW, body weight;  
24 Waist, waist circumference; WHR, waist–hip circumference ratio; HbA1c, glycated haemoglobin;  
25 HOMA-IR, homeostasis model assessment of insulin resistance; AUCIns, area under curve value  
26 of plasma insulin level during a meal test; AUCCpep, area under curve value of plasma C  
27 peptide level during a meal test; AUCGlu, area under curve value of blood glucose level during a  
28 meal test; SBP, systolic blood pressure; DBP, diastolic blood pressure; FLI, fatty liver index;  
29 LBP, lipopolysaccharides binding protein;  $\Delta\text{Ins30/G30} = (\text{Ins30} - \text{Ins0}) / (\text{G30} - \text{G0})$  during a meal  
30 test. TC, total cholesterol; LDL, low density of lipoprotein cholesterol; TG, triglycerides; HDL,  
31 high density of lipoprotein cholesterol; MCP1, monocyte chemoattractant protein-1; IL6,  
32 interleukin 6; TNF $\alpha$ , tumour necrosis factor  $\alpha$ .

33

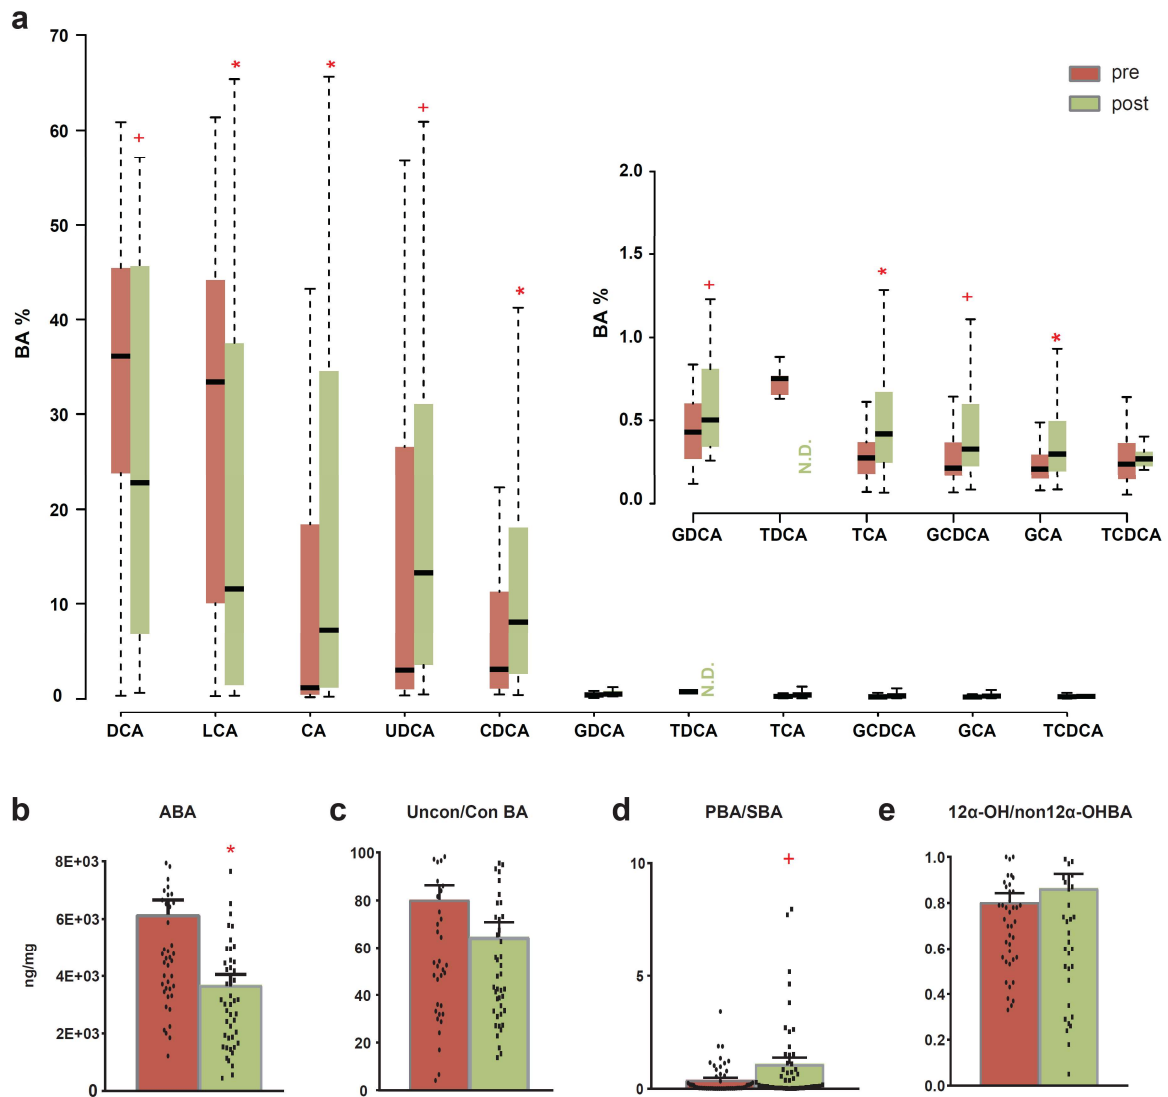

34

35 **Supplementary Figure 4. Faecal BA levels pre- and post-treatment in the Acarbose arm. (a)**

36 Percentage of different BA species in faecal samples. Plotted boxes are interquartile ranges. Dark

37 lines in the boxes indicate medians, the lowest and highest values within 1.5 times IQR from the

38 first and third quartiles. (b) Total amount of all detected faecal BAs. (c) UnconBA/ConBA ratio

39 of faecal BAs. (d) PBA/SBA ratio of faecal BAs. (e) 12α-OH /non 12α-OHBA of faecal BAs.

40 paired Wilcoxon rank-sum test, \*  $P < 0.01$ , +  $P < 0.05$ ,  $n = 50$ ; bar plot is shown as mean  $\pm$  S.D.;

41 N.D., not detected.

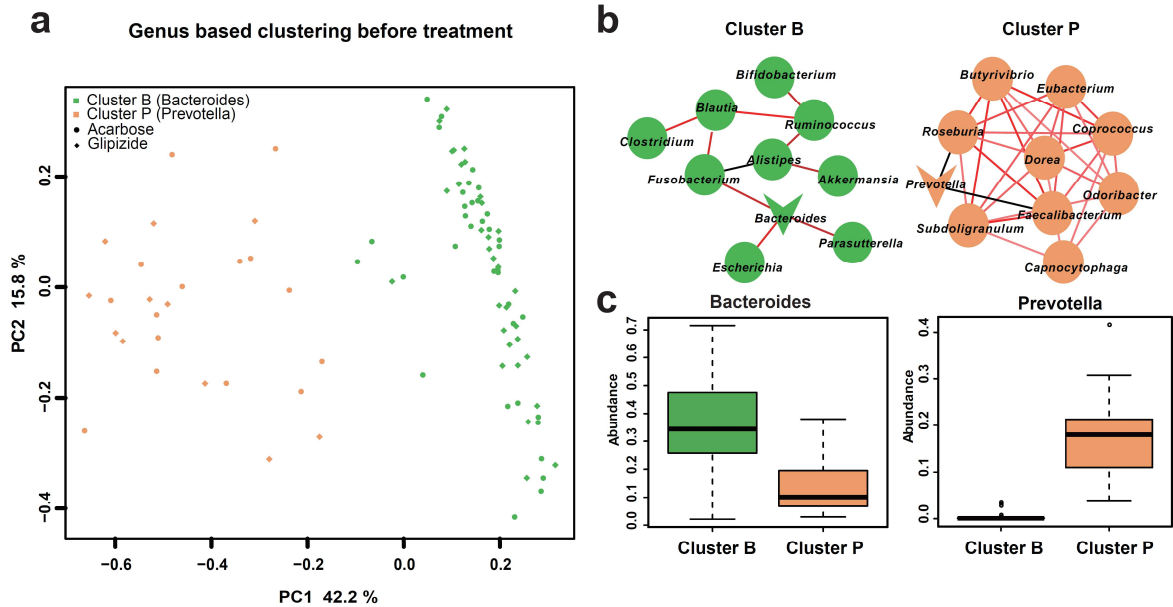

42

43 **Supplementary Figure 5. Enterotype-like clustering of the gut microbiota in**

44 **treatment-naïve T2D patients. (a)** PCA based on genera in all samples before treatment in both

45 arms. **(b)** Predominant genera in the two microbiome clusters. Arrow heads indicate the

46 representative driver genus in each cluster. Lines between genera indicate the edges between taxa.

47 Red lines indicate positive correlations, and black lines indicate negative correlations; Spearman

48 correlation,  $P < 0.05$ . **(c)** Plotted boxes show the abundances of driver genera in each cluster,

49 *Bacteroides* or *Prevotella*, Cluster B, n=68; Cluster P, n=26.





51 **Supplementary Figure 6. Plasma BA composition and therapeutic responses to Acarbose**  
52 **treatment differ in patients with different baseline microbiome compositions.**

53 (a) Differential effects of Glipizide and Acarbose on metabolic parameters and plasma BA  
54 compositions in patients stratified according to their baseline intestinal microbiome. Glycaemia,  
55 glycaemia related clinical parameters; IR, insulin secretion/resistance related indices; AF,  
56 adipose tissue secreted factors; OB, anthropometry parameters to measure body obesity; NAFLD,  
57 parameters to evaluate non-alcohol fatty liver disease; BP, blood pressures; BAs, bile acids; P,  
58 Cluster P; B, Cluster B (b) Comparison of the genus composition of the gut microbiota in  
59 patients belonging to the *Bacteroides* or *Prevotella* driven enterotype-like clusters, pre- and  
60 post-treatment with Acarbose. The 15 most abundant genera were plotted, \*, genus significantly  
61 changed in relative abundances after treatment,  $q < 0.01$ . (c) Relative abundances of genes  
62 involved in BA metabolism in samples pre- and post- treatment with Acarbose from patients  
63 with gut microbiomes belonging to the *Bacteroides* (Cluster B) or *Prevotella* (Cluster P) driven  
64 enterotype-like clusters. Plotted boxes are interquartile ranges. Dark lines in the boxes indicate  
65 medians, the lowest and highest values within 1.5 times IQR from the first and third quartiles.  
66 Cluster B, n=36; Cluster P, n=15, \*  $P < 0.01$ , +  $P < 0.05$ .

67

68 **Supplementary Tables**

69 **Supplementary Table 1** Inclusion and exclusion criteria for enrolment of patients

70

|                                                                                                                                                                                                   |
|---------------------------------------------------------------------------------------------------------------------------------------------------------------------------------------------------|
| <b>Inclusion Criteria:</b>                                                                                                                                                                        |
| 1. New onset Type 2 Diabetes; 7.0mmol/L < FBG < 13.0mmol/L, HbA1c ≤ 10%. Without any previous treatment with oral antidiabetic medicines or insulin                                               |
| 2. BMI ≤ 35 kg/m <sup>2</sup>                                                                                                                                                                     |
| 3. Age between 40-65 years old                                                                                                                                                                    |
| 4. Understand and voluntarily sign an informed consent document prior to any study related assessments/procedures are conducted                                                                   |
| <b>Exclusion Criteria</b>                                                                                                                                                                         |
| 1. Having severe digestive diseases that might cause severe constipation, chronic or acute diarrhoea                                                                                              |
| 2. Had gastroenterological or other abdominal surgeries such as cholecystectomy within one year                                                                                                   |
| 3. Having severe hepatic and renal failure (ALT ≥ 2.5 fold higher than the normal range, Scr ≥ 132 μmol/L), Psychiatric disorders, severe infectious diseases, severe anaemia, severe neutropenia |
| 4. Severe cardiac diseases, New York Heart Association (NYHA) cardiac function evaluation > III degree                                                                                            |
| 5. Had acute diabetic ketonuria acidosis and hyperosmotic coma within 3 months                                                                                                                    |
| 6. Pregnancy                                                                                                                                                                                      |
| 7. Have known hypersensitivity to test medicine (glucosidase inhibitors or sulfonylureas) or any of the inactive ingredients or have frequent/severe allergic reactions to multiple medications   |
| 8. Have been enrolled in other clinical trials within 3 months                                                                                                                                    |
| 9. Yogurt ingestion within 1 week and antibiotics usage within 3 months before the first visit for stool sample collection                                                                        |

71 **FBG**, fasting blood glucose; **HbA1c**, Haemoglobin A1c; **ALT**, alanine aminotransferase; **Scr**, Serum creatinine

72

73

74 **Supplementary Table 2** Clinical indices pre- and post-treatment in both treatment arms

75

| Clinical Index           | Unit              | Acarbose             |                      |                      |                      |                      | Glipizide            |                      |                      |                      |                      | Acarbose vs. Glipizide (Wilcoxon test) |                   |               |
|--------------------------|-------------------|----------------------|----------------------|----------------------|----------------------|----------------------|----------------------|----------------------|----------------------|----------------------|----------------------|----------------------------------------|-------------------|---------------|
|                          |                   | Pre-treatment        |                      | Post-Treatment       |                      | P value<br>(PW test) | Pre-treatment        |                      | Post-Treatment       |                      | P value<br>(PW test) | A vs. G<br>(Pre)                       | A vs. G<br>(Post) | A vs G<br>(Δ) |
|                          |                   | Value<br>(Mean ± SD) | P value<br>(SW test) | Value<br>(Mean ± SD) | P value<br>(SW test) |                      | Value<br>(Mean ± SD) | P value<br>(SW test) | Value<br>(Mean ± SD) | P value<br>(SW test) |                      | P value                                | P value           | P value       |
| Age                      | years             | 53±7                 |                      |                      |                      | NA                   | 54±7                 |                      |                      |                      | NA                   | 0.40                                   |                   | NA            |
| Sex (male/Total)         |                   | 34/51                |                      |                      |                      | NA                   | 24/43                |                      |                      |                      | NA                   | 0.39                                   |                   | NA            |
| BMI                      | kg/m <sup>2</sup> | 26.3 ± 3.2           | 1.26E-01             | 25.4 ± 3.2           | 4.08E-03             | 3.48E-07             | 26 ± 3.4             | 7.73E-05             | 25.7 ± 3.3           | 2.09E-05             | 1.13E-01             | 2.65E-01                               | 9.46E-01          | 4.21E-03      |
| BW                       | kg                | 74.7 ± 10.3          | 4.23E-01             | 72.1 ± 10.1          | 3.64E-01             | 2.36E-07             | 71.5 ± 10.7          | 2.00E-01             | 70.6 ± 10.2          | 1.77E-01             | 1.38E-01             | 6.72E-02                               | 1.90E-01          | 2.50E-03      |
| DBP                      | mmHg              | 81.6 ± 8.4           | 1.79E-02             | 75.2 ± 8.1           | 3.28E-01             | 2.99E-05             | 81 ± 10.2            | 2.39E-01             | 76.1 ± 9.1           | 6.14E-01             | 1.28E-02             | 6.75E-01                               | 7.03E-01          | 4.33E-01      |
| SBP                      | mmHg              | 127.2 ± 15.8         | 1.40E-02             | 120.5 ± 13           | 1.18E-01             | 2.16E-02             | 131 ± 18.7           | 2.29E-02             | 125.4 ± 14.5         | 2.39E-01             | 4.36E-02             | 4.31E-01                               | 1.28E-01          | 9.97E-01      |
| Waist circumference      | cm                | 91.5 ± 8.5           | 5.93E-01             | 88.6 ± 7.3           | 8.61E-01             | 3.85E-04             | 90.7 ± 8.4           | 8.21E-02             | 89.5 ± 8.4           | 1.89E-02             | 1.44E-01             | 5.27E-01                               | 8.70E-01          | 1.51E-01      |
| WHR                      |                   | 0.9 ± 0.1            | 2.19E-02             | 0.9 ± 0              | 5.43E-01             | 5.31E-03             | 0.9 ± 0.1            | 2.37E-01             | 0.9 ± 0.1            | 3.60E-01             | 1.89E-02             | 4.85E-01                               | 7.80E-01          | 7.45E-01      |
| HbA1c                    | %                 | 7.5 ± 0.8            | 9.48E-03             | 6.4 ± 0.5            | 1.79E-01             | 1.45E-09             | 7.7 ± 0.9            | 4.57E-03             | 6.3 ± 0.6            | 9.23E-01             | 1.82E-08             | 5.41E-01                               | 5.08E-01          | 4.68E-01      |
| Blood Glucose level 0'   | mmol/L            | 7.6 ± 1.4            | 1.45E-03             | 6.6 ± 0.9            | 1.84E-02             | 3.58E-07             | 7.8 ± 1.4            | 3.99E-02             | 6.7 ± 1.2            | 2.44E-03             | 2.48E-06             | 2.91E-01                               | 6.65E-01          | 3.51E-01      |
| Blood Glucose level 30'  | mmol/L            | 10.4 ± 2             | 5.96E-03             | 7.6 ± 1.4            | 2.80E-02             | 1.43E-09             | 11.1 ± 1.8           | 4.95E-04             | 8.9 ± 2.2            | 1.31E-01             | 2.88E-06             | 5.25E-02                               | 1.62E-03          | 1.73E-01      |
| Blood Glucose level 60'  | mmol/L            | 13.7 ± 2.2           | 2.69E-03             | 9.1 ± 1.8            | 1.98E-02             | 8.28E-10             | 14.6 ± 2.3           | 5.96E-04             | 11.5 ± 2.4           | 5.61E-02             | 2.60E-07             | 9.35E-02                               | 1.38E-06          | 2.90E-03      |
| Blood Glucose level 120' | mmol/L            | 14.2 ± 2.7           | 3.35E-04             | 9.2 ± 1.8            | 3.19E-04             | 5.30E-10             | 14.9 ± 2.8           | 2.53E-03             | 10.8 ± 2.8           | 4.06E-03             | 6.29E-10             | 1.64E-01                               | 2.01E-03          | 1.54E-01      |
| Blood Glucose level 180' | mmol/L            | 11.4 ± 3             | 9.05E-06             | 7.9 ± 2.1            | 9.56E-04             | 7.37E-09             | 12.6 ± 3.2           | 5.49E-03             | 8.9 ± 3              | 5.16E-03             | 9.80E-10             | 8.84E-02                               | 2.56E-01          | 4.74E-01      |
| AUC blood Glucose        | mmol/L*min        | 2241 ± 363           | 8.16E-03             | 1507 ± 263           | 1.47E-02             | 5.30E-10             | 2381 ± 351           | 5.42E-03             | 1804 ± 359           | 7.35E-02             | 6.98E-11             | 7.70E-02                               | 6.55E-05          | 4.89E-02      |
| C Peptide 0'             | ng/mL             | 1.2 ± 0.5            | 5.84E-02             | 1.1 ± 0.5            | 1.39E-04             | 1.12E-02             | 1.1 ± 0.4            | 3.24E-02             | 1.1 ± 0.4            | 7.22E-01             | 3.47E-01             | 4.34E-01                               | 7.36E-01          | 2.08E-01      |
| C Peptide 30'            | ng/mL             | 1.7 ± 0.8            | 1.81E-03             | 1.4 ± 0.6            | 2.22E-01             | 1.02E-06             | 1.6 ± 0.5            | 8.62E-02             | 2.1 ± 0.7            | 1.21E-01             | 1.38E-06             | 5.92E-01                               | 1.47E-07          | 4.91E-12      |
| C Peptide 60'            | ng/mL             | 2.7 ± 1.4            | 1.52E-02             | 1.9 ± 0.9            | 2.55E-02             | 2.30E-06             | 2.4 ± 0.9            | 1.95E-02             | 2.9 ± 1              | 1.19E-02             | 3.42E-04             | 3.63E-01                               | 1.28E-08          | 4.99E-09      |
| C Peptide 120'           | ng/mL             | 3.9 ± 1.7            | 4.57E-03             | 2.8 ± 1.1            | 4.83E-01             | 8.13E-08             | 3.8 ± 1.3            | 7.39E-01             | 4.2 ± 1.4            | 5.72E-01             | 2.14E-02             | 9.44E-01                               | 3.54E-08          | 9.39E-08      |
| C Peptide 180'           | ng/mL             | 3.6 ± 1.6            | 7.96E-05             | 2.5 ± 1.2            | 4.81E-03             | 7.49E-08             | 3.5 ± 1.2            | 8.69E-01             | 3.8 ± 1.2            | 4.36E-01             | 1.04E-01             | 4.81E-01                               | 7.73E-08          | 1.03E-06      |
| AUC C Peptide            | ng/mL*min         | 528 ± 210            | 1.96E-02             | 384 ± 143            | 8.05E-01             | 1.94E-08             | 501 ± 154            | 2.57E-01             | 575 ± 161            | 1.54E-01             | 1.95E-03             | 9.78E-01                               | 1.94E-07          | 4.78E-10      |
| Insulin 0'               | pmol/L            | 83.8 ± 45.1          | 7.16E-05             | 68.6 ± 44.2          | 6.44E-05             | 2.12E-02             | 80.7 ± 47            | 3.62E-03             | 76.3 ± 48.6          | 2.20E-03             | 6.03E-01             | 5.92E-01                               | 7.76E-01          | 1.57E-01      |
| Insulin30'               | pmol/L            | 138.9 ± 79.8         | 1.67E-05             | 100.5 ± 58           | 1.69E-04             | 9.12E-04             | 135.2 ± 65.7         | 1.15E-02             | 194.1 ± 112.6        | 1.26E-05             | 2.61E-05             | 8.93E-01                               | 2.26E-06          | 1.29E-07      |
| Insulin 60'              | pmol/L            | 258.5 ± 163.2        | 2.63E-07             | 157.4 ± 97.5         | 1.26E-03             | 2.73E-05             | 226.6 ± 121.2        | 2.35E-01             | 283.3 ± 172.5        | 1.48E-03             | 6.03E-03             | 3.93E-01                               | 1.26E-06          | 1.03E-06      |
| Insulin120'              | pmol/L            | 361.8 ± 224.1        | 3.39E-07             | 210.6 ± 119.1        | 2.11E-07             | 3.85E-06             | 318.8 ± 156.3        | 2.19E-03             | 378.9 ± 223.6        | 3.84E-02             | 5.72E-02             | 6.39E-01                               | 2.53E-06          | 7.78E-06      |
| Insulin180'              | pmol/L            | 286.7 ± 180.6        | 2.22E-04             | 169.2 ± 127          | 5.77E-03             | 1.63E-06             | 277.8 ± 151.6        | 5.86E-02             | 309.6 ± 170.3        | 1.72E-04             | 1.31E-01             | 7.66E-01                               | 6.78E-06          | 1.30E-05      |
| AUC Insulin*             | pmol/L*min        | 1029.9 ± 575.2       | 1.50E-06             | 637.1 ± 342.6        | 6.61E-04             | 2.41E-06             | 940.2 ± 431.7        | 1.62E-01             | 1139.6 ± 608.9       | 3.83E-04             | 1.90E-02             | 6.97E-01                               | 1.62E-06          | 9.54E-08      |
| LDL                      | mmol/L            | 1.2 ± 0.4            | 3.78E-08             | 1.2 ± 0.3            | 5.71E-05             | 2.76E-01             | 1.2 ± 0.4            | 1.15E-08             | 1.3 ± 0.6            | 9.43E-09             | 5.35E-01             | 5.00E-01                               | 8.64E-01          | 7.68E-01      |
| HDL                      | mmol/L            | 3.1 ± 1              | 6.54E-03             | 3 ± 1                | 5.66E-01             | 4.84E-01             | 3.1 ± 0.8            | 8.73E-01             | 2.9 ± 0.8            | 1.93E-01             | 3.58E-02             | 4.92E-01                               | 5.14E-01          | 2.07E-01      |
| APOA                     | g/L               | 1.3 ± 0.2            | 7.22E-01             | 1.2 ± 0.2            | 6.96E-01             | 2.46E-03             | 1.4 ± 0.1            | 5.74E-01             | 1.3 ± 0.2            | 9.22E-01             | 2.25E-01             | 7.97E-01                               | 2.35E-01          | 1.01E-01      |
| APOB                     | g/L               | 1.1 ± 0.3            | 3.02E-01             | 1 ± 0.3              | 8.29E-01             | 2.98E-01             | 1 ± 0.2              | 4.69E-01             | 1 ± 0.2              | 8.76E-01             | 2.36E-01             | 7.87E-01                               | 9.15E-01          | 8.76E-01      |
| TC                       | mmol/L            | 5.1 ± 1.2            | 3.79E-02             | 4.8 ± 1.2            | 6.43E-02             | 7.47E-03             | 4.9 ± 1              | 3.73E-02             | 4.8 ± 0.8            | 7.28E-01             | 2.28E-01             | 6.96E-01                               | 7.12E-01          | 3.18E-01      |

|                           |          |                   |          |                   |          |          |                   |          |                   |          |          |          |          |          |
|---------------------------|----------|-------------------|----------|-------------------|----------|----------|-------------------|----------|-------------------|----------|----------|----------|----------|----------|
| TG                        | mmol/L   | 2.5 ± 2.1         | 6.55E-09 | 1.6 ± 1.2         | 2.11E-09 | 2.39E-05 | 2 ± 1.2           | 2.17E-05 | 1.7 ± 0.8         | 1.27E-03 | 3.82E-01 | 4.59E-01 | 9.27E-02 | 3.19E-03 |
| AST                       | IU/L     | 30.6 ± 24.9       | 2.60E-11 | 24.4 ± 15.3       | 6.32E-10 | 3.96E-03 | 25.9 ± 14.5       | 1.02E-07 | 20.8 ± 5.3        | 3.74E-06 | 4.36E-02 | 1.73E-01 | 5.96E-01 | 4.33E-01 |
| AKP                       | IU/L     | 73.6 ± 23.3       | 1.94E-03 | 64.5 ± 22.2       | 3.85E-04 | 1.26E-04 | 69.6 ± 14.8       | 9.12E-01 | 66.1 ± 16.8       | 3.98E-01 | 2.74E-02 | 8.99E-01 | 2.92E-01 | 3.26E-01 |
| ALB                       | g/L      | 48.5 ± 31.4       | 1.74E-14 | 42.9 ± 3.1        | 2.57E-01 | 1.61E-02 | 43.5 ± 3          | 2.81E-01 | 43.4 ± 3.3        | 1.13E-02 | 6.11E-01 | 5.07E-01 | 9.87E-01 | 1.32E-01 |
| ALT                       | IU/L     | 38.6 ± 27.3       | 2.19E-07 | 33.7 ± 37.1       | 1.14E-11 | 1.38E-02 | 33 ± 25.5         | 4.82E-08 | 24.1 ± 11.1       | 2.29E-08 | 2.25E-02 | 1.20E-01 | 2.96E-01 | 6.16E-01 |
| γGT                       | IU/L     | 48 ± 53.9         | 2.22E-10 | 30.1 ± 33.5       | 6.42E-11 | 3.03E-06 | 33.5 ± 20.4       | 6.42E-05 | 27.9 ± 22.8       | 4.54E-08 | 1.70E-02 | 2.96E-01 | 6.27E-01 | 2.38E-02 |
| Uric acid                 | umol/L   | 5 ± 1             | 8.42E-01 | 4.8 ± 1.4         | 3.19E-01 | 1.83E-01 | 5.2 ± 1.3         | 5.35E-01 | 5.2 ± 1.5         | 2.02E-01 | 9.60E-01 | 4.31E-01 | 3.26E-01 | 2.86E-01 |
| Creatine                  | umol/L   | 67.4 ± 14.3       | 8.60E-01 | 67.6 ± 14.6       | 2.02E-01 | 5.21E-01 | 67.2 ± 14         | 6.74E-01 | 66.2 ± 13.1       | 2.47E-01 | 6.84E-01 | 8.82E-01 | 7.17E-01 | 4.80E-01 |
| Bun                       | mmol/L   | 308.3 ± 73.3      | 2.47E-01 | 328.5 ± 60.2      | 1.98E-01 | 6.85E-03 | 292.5 ± 68.5      | 1.96E-02 | 294.5 ± 50.7      | 5.02E-01 | 4.20E-01 | 1.77E-01 | 1.10E-02 | 1.49E-01 |
| HOMA-IR*                  | uIU*mmol | 3.7 ± 2.3         | 2.71E-05 | 2.6 ± 1.8         | 4.16E-05 | 2.25E-03 | 3.6 ± 2.1         | 8.33E-03 | 2.9 ± 2           | 5.24E-04 | 5.05E-02 | 8.68E-01 | 6.38E-01 | 2.39E-01 |
| HOMA-β*                   | %        | 55 ± 32.9         | 1.65E-07 | 60 ± 43.8         | 1.07E-06 | 9.88E-01 | 52.5 ± 37.6       | 1.06E-05 | 70.9 ± 61.9       | 1.19E-07 | 7.38E-03 | 1.94E-01 | 8.44E-01 | 4.07E-02 |
| FLI                       |          | 334 ± 555         | 6.61E-11 | 101 ± 147         | 5.46E-11 | 1.92E-09 | 237 ± 341         | 8.97E-09 | 162 ± 271         | 4.70E-10 | 1.33E-02 | 3.52E-01 | 4.00E-01 | 5.85E-13 |
| ΔIns30/G30*               | uIU/mmol | 2.2 ± 3.5         | 7.69E-06 | 31 ± 111          | 2.13E-13 | 1.19E-02 | 2 ± 1.8           | 1.80E-01 | 10.9 ± 15.6       | 1.09E-09 | 1.64E-08 | 6.80E-01 | 1.53E-01 | 2.75E-02 |
| CRP                       | ug/mL    | 12.6 ± 15.4       | 2.10E-11 | 26.8 ± 64.2       | 6.61E-13 | 6.29E-01 | 16.8 ± 40.1       | 1.15E-12 | 12.4 ± 12.6       | 3.52E-07 | 3.17E-01 | 2.85E-01 | 9.63E-01 | 7.79E-01 |
| TNF α                     | pg/mL    | 4.5 ± 2.1         | 5.39E-05 | 4.7 ± 2.3         | 1.81E-02 | 4.23E-01 | 5.3 ± 3.8         | 4.31E-07 | 4.7 ± 2.5         | 1.45E-04 | 1.05E-01 | 2.30E-01 | 9.78E-01 | 6.59E-02 |
| LBP (LPS binding protein) | ng/mL    | 18.4 ± 5.8        | 2.83E-01 | 17.4 ± 6.4        | 1.37E-01 | 7.33E-01 | 22.1 ± 8.7        | 8.24E-02 | 18.8 ± 6.2        | 5.88E-02 | 3.47E-02 | 2.87E-02 | 6.90E-01 | 1.68E-01 |
| IL6                       | pg/mL    | 2.4 ± 4.5         | 1.43E-11 | 4.3 ± 8.4         | 1.35E-10 | 7.61E-02 | 3.5 ± 5.2         | 2.60E-09 | 1.8 ± 1.9         | 4.26E-08 | 1.68E-03 | 2.95E-02 | 1.04E-01 | 2.51E-04 |
| IL8                       | ng/mL    | 13.6 ± 19.2       | 1.64E-10 | 13 ± 20.1         | 1.34E-10 | 9.88E-01 | 22.2 ± 31.4       | 1.18E-08 | 11.6 ± 17.3       | 1.33E-09 | 3.47E-02 | 1.47E-01 | 4.55E-01 | 7.52E-02 |
| mpo                       | ng/mL    | 380 ± 351         | 5.18E-06 | 334 ± 302         | 6.98E-07 | 6.57E-01 | 441 ± 360         | 3.53E-05 | 342 ± 373         | 1.46E-08 | 2.48E-02 | 2.05E-01 | 8.95E-01 | 1.69E-01 |
| MCP1                      | pg/mL    | 235.6 ± 89.3      | 7.34E-01 | 255.5 ± 90.2      | 9.36E-01 | 2.79E-03 | 256 ± 154         | 5.39E-09 | 263 ± 156         | 2.62E-09 | 3.59E-01 | 8.38E-01 | 4.55E-01 | 1.46E-01 |
| PAI1                      | pg/mL    | 55585 ± 18211     | 9.32E-02 | 55291 ± 22546     | 7.20E-05 | 7.37E-01 | 61351 ± 23327     | 1.05E-03 | 54972 ± 21238     | 1.87E-03 | 5.20E-02 | 4.59E-01 | 8.88E-01 | 1.47E-01 |
| Endothelin-1              | pg/mL    | 12.8 ± 3          | 1.15E-05 | 13.7 ± 2.8        | 6.15E-03 | 1.48E-02 | 12.9 ± 2.8        | 1.40E-03 | 13.3 ± 3.5        | 1.08E-06 | 2.84E-01 | 8.46E-01 | 3.56E-01 | 3.19E-01 |
| FetuinA                   | ug/mL    | 338.8 ± 50.7      | 5.94E-01 | 406 ± 109         | 4.18E-08 | 2.76E-07 | 327.2 ± 43.1      | 5.02E-01 | 392.2 ± 84.7      | 2.79E-07 | 1.73E-10 | 2.20E-01 | 6.81E-01 | 3.95E-01 |
| FGF19                     | MFI      | 22.5 ± 4.1        | 7.17E-01 | 19.6 ± 4.2        | 1.70E-05 | 1.34E-05 | 23.8 ± 3.9        | 2.34E-01 | 21.4 ± 4.8        | 2.21E-03 | 2.26E-03 | 1.68E-01 | 3.12E-01 | 9.75E-01 |
| FGF21                     | MFI      | 141.1 ± 68.8      | 2.87E-08 | 99.4 ± 59         | 4.77E-09 | 3.08E-06 | 146 ± 107         | 1.43E-04 | 128.2 ± 75.3      | 5.46E-05 | 1.63E-01 | 7.41E-01 | 6.97E-01 | 1.38E-02 |
| FGF23                     | MFI      | 44.2 ± 6.7        | 3.70E-02 | 39 ± 9.6          | 2.74E-04 | 1.73E-03 | 45.5 ± 10.8       | 4.16E-05 | 43.1 ± 14.1       | 9.45E-08 | 8.93E-03 | 8.37E-01 | 5.23E-01 | 4.57E-01 |
| Adiponectin               | pg/mL    | 5296311 ± 3989030 | 3.94E-06 | 6659153 ± 6643764 | 1.36E-07 | 3.32E-03 | 5812437 ± 2657385 | 1.48E-05 | 5866403 ± 2998557 | 1.03E-01 | 5.38E-01 | 5.39E-02 | 6.85E-01 | 1.40E-01 |
| Leptin                    | pg/mL    | 6566 ± 6138       | 9.52E-07 | 5881 ± 8247       | 9.33E-11 | 1.03E-02 | 6408 ± 6743       | 2.32E-07 | 6485 ± 6630       | 6.66E-08 | 3.39E-01 | 6.52E-01 | 1.90E-01 | 1.88E-02 |

76 Data are presented as mean ± SD.

77 P value (SW test), P values calculated by Shapiro–Wilk test; P value (PW test), P values calculated by paired Wilcoxon rank-sum test; \*, the unit of insulin is converted to uIU/L. MFI, mean fluorescence intensity determined by using the Luminex 200™ instrument.

78 A vs G (Pre), comparison of pre-treatment values between Acarbose and Glipizide arms; A vs G (Post), comparison of post treatment values between Acarbose and Glipizide arms.; A vs G (Δ), comparison of changes induced by each treatment arm

79 **BW**, body weight; **DBP**, diastolic blood pressure; **SBP**, systolic blood pressure; **WHR**, waist-to-hip ratio; **HbA1c**, Haemoglobin A1c;

80 **AUC Insulin**, area under curve value of plasma insulin level during meal test; **AUC C peptide**, area under curve value of plasma C peptide level during meal test; **AUC Glucose**, area under curve value of blood glucose level during meal test;

81 **LDL**, low-density lipoprotein; **HDL**, high-density lipoprotein; **APOA**, apolipoprotein A; **APOB**, apolipoprotein B; **TC**, total cholesterol; **TG**, triglyceride; **AST**, aspartate aminotransferase; **ALB**, albumin; **ALT**, alanine transaminase; **γGT**, gamma-glutamyltransferase; **Bun**,

82 blood urea nitrogen; **HOMA-IR**, the homeostasis model assessment-insulin resistance; **HOMA-β**, the homeostasis model assessment-β-cell function; **FLI**, fatty liver index;  $\Delta \text{Ins30/G30} = (\text{Insulin } 30' - \text{Insulin } 0') / (\text{blood Glucose level } 30' - \text{blood Glucose level } 0')$  during meal

83 test. **CRP**, C-reactive protein; **TNFα**, tumour necrosis factor α; **LBP**, lipopolysaccharides binding protein; **IL**, interleukin; **MCP-1**, monocyte chemoattractant protein-1; **PAI1**, plasminogen activator inhibitor-1; FGF, fibroblast growth factor.

84 **Supplementary Table 3** Plasma bile acid pre-and post-treatment in both treatment arms

85

| Plasma bile acid (nmol/L) | Acarbose      |                |                                 |                           | Glipizide     |                |                                 |                           | Acarbose pre vs. Glipizide pre  |
|---------------------------|---------------|----------------|---------------------------------|---------------------------|---------------|----------------|---------------------------------|---------------------------|---------------------------------|
|                           | Pre-Treatment | Post-Treatment | <i>P</i> value (Absolute value) | <i>P</i> value (% of ABA) | Pre-Treatment | Post-Treatment | <i>P</i> value (Absolute value) | <i>P</i> value (% of ABA) | <i>P</i> value (Absolute value) |
| <b>Primary BAs</b>        |               |                |                                 |                           |               |                |                                 |                           |                                 |
| CA                        | 100±133       | 211±258        | 2.00E-03                        | 0.002                     | 134±268       | 119±200        | 5.69E-01                        | 7.29E-01                  | 5.50E-01                        |
| CDCA                      | 297±328       | 680±550        | 3.20E-05                        | 4.20E-08                  | 290±396       | 396±870        | 8.24E-01                        | 2.23E-01                  | 5.93E-01                        |
| GCA                       | 366±629       | 249±432        | 4.00E-03                        | 9.01E-05                  | 401±781       | 329±617        | 1.87E-01                        | 2.18E-01                  | 6.24E-01                        |
| TCA                       | 40±86         | 22±45          | 1.00E-03                        | 2.56E-04                  | 34±76         | 32±71          | 9.80E-01                        | 2.48E-01                  | 2.48E-01                        |
| TCDCa                     | 119±187       | 76±77          | 1.59E-01                        | 8.59E-04                  | 92±145        | 89±140         | 6.75E-01                        | 8.24E-01                  | 5.06E-01                        |
| GCDCA                     | 1124±1263     | 959±992        | 2.87E-01                        | 4.20E-03                  | 1156±1568     | 1001±1341      | 3.33E-01                        | 2.18E-02                  | 9.02E-01                        |
| <b>Secondary BAs</b>      |               |                |                                 |                           |               |                |                                 |                           |                                 |
| UDCA                      | 179±282       | 256±346        | 1.29E-01                        | 0.407                     | 234±336       | 245±395        | 2.38E-01                        | 8.14E-01                  | 9.53E-01                        |
| TUDCA                     | 16±27         | 8±8            | 3.30E-02                        | 2.94E-04                  | 14±25         | 9±13           | 2.96E-01                        | 5.60E-01                  | 4.57E-01                        |
| GUDCA                     | 112±135       | 87±93          | 2.87E-01                        | 0.061                     | 126±175       | 96±110         | 2.63E-01                        | 3.78E-01                  | 8.71E-01                        |
| DCA                       | 184±191       | 142±166        | 2.30E-01                        | 0.039                     | 198±219       | 183±160        | 7.22E-01                        | 9.61E-01                  | 9.46E-01                        |
| LCA                       | 18±20         | 13±13          | 5.50E-02                        | 0.234                     | 15±12         | 16±11          | 7.10E-01                        | 4.13E-01                  | 9.84E-01                        |
| TDCA                      | 38±75         | 13±15          | 7.91E-04                        | 3.07E-04                  | 29±52         | 31±39          | 6.82E-01                        | 1.28E-01                  | 8.21E-01                        |
| GDCA                      | 468±806       | 175±292        | 2.00E-03                        | 5.17E-05                  | 470±907       | 421±575        | 9.95E-01                        | 4.08E-01                  | 7.65E-01                        |
| GLCA                      | 8±13          | 5±5            | 3.01E-01                        | 0.448                     | 12±27         | 10±15          | 9.02E-01                        | 5.44E-01                  | 2.36E-01                        |
| TLCA                      | 8±17          | 4±4            | 7.80E-02                        | 0.080                     | 7±11          | 7±7            | 6.56E-01                        | 8.24E-01                  | 5.99E-01                        |
| <b>BA index</b>           |               |                |                                 |                           |               |                |                                 |                           |                                 |

|                                       |           |           |          |  |           |           |          |  |          |
|---------------------------------------|-----------|-----------|----------|--|-----------|-----------|----------|--|----------|
| UnconBA/ConBA                         | 0.7±0.6   | 1.4±1.3   | 9.89E-06 |  | 0.5±0.4   | 0.8±1.1   | 1.02E-01 |  | 6.77E-01 |
| 12 $\alpha$ -OH/non 12 $\alpha$ -OHBA | 0.7±0.5   | 0.5±0.3   | 2.00E-03 |  | 0.7±0.4   | 0.8±0.5   | 5.36E-01 |  | 5.82E-01 |
| PBA/SBA                               | 2.2±1.5   | 4.9±4.8   | 3.57E-05 |  | 1.9±1.2   | 1.8±1.5   | 3.46E-01 |  | 3.12E-01 |
| TaurineBA                             | 222±371   | 121±126   | 1.35E-02 |  | 178±286   | 168±244   | 7.86E-01 |  | 5.66E-01 |
| ABA                                   | 3342±3265 | 3111±2135 | 7.88E-01 |  | 3461±4011 | 3219±3226 | 8.24E-01 |  | 9.09E-01 |

86 Data are presented as mean  $\pm$  SD; 91 of 94 have plasma BA profiles assayed. Unit of all BAs is nmol/L.

87 CA, cholic acid; GCA, glycocholic acid; TCA, taurocholic acid

88 CDCA, chenodeoxycholic acid; TCDCA, taurochenodeoxycholic acid; GCDCA, glycochenodeoxycholic acid

89 UDCA, ursodeoxycholic acid; TUDCA, tauroursodeoxycholic acid; GUDCA, glyoursodeoxycholic acid

90 DCA, deoxycholic acid; GDCA, glycodeoxycholic acid; TDCA, taurodeoxycholic acid

91 LCA, lithocholic acid, GLCA; glycolithocholic acid, TLCA; tauroolithocholic acid

92 UnconBA, unconjugated bile acids; ConBA, conjugated bile acids;

93 12 $\alpha$ -OH, 12 $\alpha$ -hydroxylated; PBA, primary bile acids; SBA, secondary bile acids; ABA, sum of all bile acids

94 1. 12  $\alpha$ -OH/non12 $\alpha$ -OHBA = GCA+CA+TCA+GDCA+DCA+TDCA) / (TUDCA+CDCA+TCDCA+GLCA+LCA+UDCA+GCDCA+TLCA+GUDCA

95 2. UnconBA/ConBA = CA + UDCA + CDCA + DCA + LCA) / (GCDCA + GDCA + GUDCA + GCA + TUDCA + TCA + TCDCA + TDCA + GLCA + TLCA

96 3. PBA/SBA = GCDCA+ TCDCA + CDCA + CA + TCA + GCA) / (UDCA + GUDCA + TUDCA + DCA + TDCA + GDCA + LCA + GLCA + TLCA

97 4. TaurineBA = TUDCA + TCA + TCDCA + TDCA + TLCA

98 5. ABA=UDCA + GCDCA + GDCA + GUDCA + CA + GCA + TUDCA + TCA + CDCA + DCA + TCDCA + TDCA + GLCA + LCA + TLCA

99 *P* value (Absolute value) indicates the *P* values were calculated based on absolute values of plasma BAs.

100 *P* value (% of ABA) indicates the *P* values were calculated based on percentage of each BA species in ABA.

101 **Supplementary Table 4** Generalized estimated equations analysis for the contribution of  
102 plasma bile acid composition to clinical outcomes  
103

| Clinical index      | 12 $\alpha$ -OH/non 12 $\alpha$ -OHBA |          |          | PBA/SBA |          |          | UnconBA/ConBA |          |          |
|---------------------|---------------------------------------|----------|----------|---------|----------|----------|---------------|----------|----------|
|                     | $\beta$                               | P value  | q value  | $\beta$ | P value  | q value  | $\beta$       | P value  | q value  |
| HOMA-IR             | 0.012                                 | 9.14E-01 | 9.26E-01 | -0.104  | 2.18E-01 | 3.65E-01 | -0.347        | 7.72E-07 | 1.85E-05 |
| AUCIns              | 0.096                                 | 2.89E-01 | 4.96E-01 | -0.213  | 4.88E-03 | 7.70E-02 | -0.316        | 1.09E-05 | 1.31E-04 |
| AUCGlu              | 0.057                                 | 5.61E-01 | 7.91E-01 | -0.151  | 5.17E-02 | 1.77E-01 | -0.314        | 1.41E-04 | 1.13E-03 |
| $\Delta$ Ins30/G30  | -0.122                                | 1.07E-01 | 2.85E-01 | 0.193   | 2.28E-01 | 3.65E-01 | -0.019        | 7.56E-01 | 9.08E-01 |
| HOMA- $\beta$       | 0.010                                 | 9.26E-01 | 9.26E-01 | -0.030  | 7.76E-01 | 8.86E-01 | -0.231        | 2.49E-03 | 8.54E-03 |
| AUCC <sub>pep</sub> | 0.137                                 | 9.08E-02 | 2.85E-01 | -0.192  | 1.81E-02 | 9.44E-02 | -0.298        | 8.53E-04 | 4.10E-03 |
| HbA1c               | -0.032                                | 6.93E-01 | 8.69E-01 | -0.113  | 1.87E-01 | 3.65E-01 | -0.205        | 1.38E-02 | 3.67E-02 |
| WHR                 | 0.144                                 | 5.51E-02 | 2.65E-01 | -0.012  | 8.32E-01 | 9.08E-01 | -0.006        | 9.31E-01 | 9.31E-01 |
| BW                  | 0.080                                 | 5.27E-03 | 4.22E-02 | -0.073  | 1.72E-02 | 9.44E-02 | -0.094        | 4.72E-04 | 2.83E-03 |
| SBP                 | -0.040                                | 7.24E-01 | 8.69E-01 | 0.099   | 4.05E-01 | 4.86E-01 | -0.161        | 2.57E-02 | 5.61E-02 |
| DBP                 | 0.072                                 | 5.23E-01 | 7.84E-01 | -0.103  | 2.10E-01 | 3.65E-01 | -0.186        | 4.06E-02 | 7.50E-02 |
| FLI                 | -0.068                                | 2.66E-01 | 4.94E-01 | -0.092  | 2.09E-01 | 3.65E-01 | -0.169        | 1.15E-02 | 3.46E-02 |
| TG                  | -0.074                                | 1.56E-01 | 3.74E-01 | -0.329  | 6.41E-03 | 7.70E-02 | -0.219        | 1.97E-03 | 7.89E-03 |
| TC                  | 0.112                                 | 1.97E-01 | 4.31E-01 | -0.158  | 2.69E-02 | 1.08E-01 | -0.080        | 3.28E-01 | 5.02E-01 |
| LDL                 | -0.005                                | 9.25E-01 | 9.26E-01 | -0.038  | 4.04E-01 | 4.86E-01 | -0.065        | 4.65E-01 | 6.53E-01 |
| HDL                 | 0.137                                 | 9.74E-02 | 2.85E-01 | -0.002  | 9.76E-01 | 9.76E-01 | -0.049        | 4.90E-01 | 6.53E-01 |
| FGF19               | 0.254                                 | 3.84E-03 | 4.22E-02 | -0.147  | 1.97E-02 | 9.44E-02 | -0.173        | 3.80E-02 | 7.50E-02 |
| FGF21               | -0.020                                | 7.83E-01 | 8.95E-01 | 0.039   | 1.55E-01 | 3.65E-01 | 0.054         | 3.17E-01 | 5.02E-01 |
| LBP                 | -0.085                                | 2.68E-01 | 4.94E-01 | -0.120  | 2.20E-01 | 3.65E-01 | -0.009        | 9.17E-01 | 9.31E-01 |
| TNF $\alpha$        | -0.154                                | 1.24E-02 | 7.45E-02 | 0.087   | 3.86E-01 | 4.86E-01 | 0.053         | 6.60E-01 | 8.34E-01 |
| MCP1                | -0.243                                | 1.49E-08 | 3.58E-07 | 0.005   | 9.23E-01 | 9.63E-01 | 0.124         | 2.56E-02 | 5.61E-02 |
| IL6                 | -0.171                                | 8.43E-02 | 2.85E-01 | 0.056   | 3.62E-01 | 4.86E-01 | 0.023         | 8.64E-01 | 9.31E-01 |
| Adiponectin         | 0.042                                 | 6.41E-01 | 8.55E-01 | -0.044  | 3.81E-01 | 4.86E-01 | -0.011        | 8.38E-01 | 9.31E-01 |
| Leptin              | 0.042                                 | 4.48E-01 | 7.17E-01 | 0.131   | 1.88E-01 | 3.65E-01 | 0.054         | 3.35E-01 | 5.02E-01 |

104  $\beta$ , correlation coefficients in generalized estimating equations model.

105

106 **Supplementary Table 5** Metagenomic data production from both treatment arms

|                  | Mean Clean reads | Mean Mapping rate (%) | Abundance changed after treatment |                          | Abundance changed after treatment |                          |
|------------------|------------------|-----------------------|-----------------------------------|--------------------------|-----------------------------------|--------------------------|
|                  |                  |                       | Gene number ( $P<0.01$ )          | mOTU number ( $P<0.05$ ) | Gene number ( $q<0.01$ )          | mOTU number ( $q<0.01$ ) |
| <b>Acarbose</b>  | 7.7Gb            | 80.07                 | 472847                            | 162                      | 141382                            | 69                       |
| <b>Glipizide</b> | 7.4Gb            | 81.12                 | 6711                              | 5                        | 0                                 | 0                        |

107 Q value indicates an FDR adjusted p-value by Benjamini & Hochberg (BH) method.

108



109 **Supplementary Table 6** List of mOTUs that changed in relative abundance in response to  
 110 treatment in the Acarbose and the Glipizide arms ( $P < 0.05$ )  
 111

| <b>Acarbose</b>                                                              |                |                |                           |             |
|------------------------------------------------------------------------------|----------------|----------------|---------------------------|-------------|
| <b>mOTU ID</b>                                                               | <b>P value</b> | <b>q value</b> | <b>Relative Abundance</b> |             |
|                                                                              |                |                | <b>Pre</b>                | <b>Post</b> |
| <i>Prevotella copri</i>                                                      | 8.17E-03       | 2.67E-02       | 1.03E-01                  | 1.34E-01    |
| <i>Bacteroides dorei/vulgatus</i>                                            | 2.35E-07       | 1.01E-05       | 8.30E-02                  | 3.50E-02    |
| <i>Bacteroides plebeius</i>                                                  | 2.21E-03       | 9.79E-03       | 5.45E-02                  | 2.97E-02    |
| <i>Bacteroides uniformis</i>                                                 | 2.02E-04       | 1.42E-03       | 3.34E-02                  | 1.65E-02    |
| <i>Alistipes putredinis</i>                                                  | 2.35E-07       | 1.01E-05       | 2.25E-02                  | 7.08E-03    |
| <i>Bacteroides stercoris</i>                                                 | 8.48E-05       | 6.95E-04       | 2.25E-02                  | 8.74E-03    |
| <i>motu linkage group 158</i>                                                | 3.20E-06       | 8.03E-05       | 2.10E-02                  | 3.01E-03    |
| <i>Eubacterium eligens</i>                                                   | 4.34E-04       | 2.67E-03       | 1.92E-02                  | 7.48E-03    |
| <i>motu linkage group 284</i>                                                | 7.96E-09       | 2.40E-06       | 1.42E-02                  | 1.92E-03    |
| <i>motu linkage group 115</i>                                                | 1.18E-02       | 3.30E-02       | 1.26E-02                  | 9.85E-03    |
| <i>Parabacteroides distasonis</i>                                            | 1.08E-02       | 3.15E-02       | 1.22E-02                  | 1.73E-02    |
| <i>Bacteroides thetaiotaomicron</i>                                          | 1.73E-05       | 2.16E-04       | 1.16E-02                  | 3.19E-03    |
| <i>motu linkage group 104</i>                                                | 2.02E-02       | 4.94E-02       | 1.13E-02                  | 2.40E-02    |
| <i>motu linkage group 325</i>                                                | 1.23E-06       | 3.69E-05       | 1.10E-02                  | 5.27E-04    |
| <i>Bacteroides xylanisolvens</i>                                             | 1.95E-02       | 4.81E-02       | 1.02E-02                  | 6.07E-03    |
| <i>motu linkage group 536</i>                                                | 1.27E-02       | 3.42E-02       | 9.70E-03                  | 4.09E-03    |
| <i>motu linkage group 260</i>                                                | 6.92E-03       | 2.30E-02       | 9.40E-03                  | 2.14E-03    |
| <i>Roseburia inulinivorans</i>                                               | 1.52E-05       | 2.07E-04       | 9.25E-03                  | 3.09E-03    |
| <i>motu linkage group 134</i>                                                | 2.33E-03       | 1.00E-02       | 9.05E-03                  | 2.19E-03    |
| <i>motu linkage group 290</i>                                                | 1.14E-02       | 3.24E-02       | 7.95E-03                  | 3.31E-03    |
| <i>motu linkage group 258</i>                                                | 8.54E-06       | 1.71E-04       | 7.94E-03                  | 2.09E-03    |
| <i>motu linkage group 206</i>                                                | 1.44E-07       | 8.67E-06       | 6.90E-03                  | 7.53E-04    |
| <i>Streptococcus salivarius</i>                                              | 6.38E-06       | 1.37E-04       | 6.43E-03                  | 1.32E-02    |
| <i>motu linkage group 490</i>                                                | 2.75E-04       | 1.88E-03       | 6.39E-03                  | 3.66E-03    |
| <i>motu linkage group 131</i>                                                | 9.58E-04       | 5.06E-03       | 6.34E-03                  | 3.49E-03    |
| <i>Bifidobacterium catenulatum-Bifidobacterium pseudocatenulatum complex</i> | 1.46E-05       | 2.07E-04       | 6.24E-03                  | 3.11E-02    |
| <i>motu linkage group 316</i>                                                | 4.79E-04       | 2.77E-03       | 6.05E-03                  | 1.92E-02    |
| <i>Ruminococcus sp. 5 1 39BFAA</i>                                           | 5.29E-04       | 2.95E-03       | 5.62E-03                  | 3.18E-03    |
| <i>Roseburia intestinalis</i>                                                | 2.24E-05       | 2.41E-04       | 5.24E-03                  | 3.45E-04    |
| <i>Alistipes shahii</i>                                                      | 5.13E-03       | 1.82E-02       | 4.78E-03                  | 3.42E-03    |
| <i>Collinsella aerofaciens</i>                                               | 7.29E-05       | 6.45E-04       | 4.72E-03                  | 1.43E-02    |
| <i>Bifidobacterium longum</i>                                                | 5.38E-07       | 2.02E-05       | 4.49E-03                  | 5.35E-02    |
| <i>Bacteroides caccae</i>                                                    | 3.09E-03       | 1.26E-02       | 4.06E-03                  | 1.96E-03    |
| <i>motu linkage group 349</i>                                                | 2.05E-08       | 3.09E-06       | 3.89E-03                  | 9.57E-04    |
| <i>motu linkage group 265</i>                                                | 5.52E-03       | 1.91E-02       | 3.79E-03                  | 1.31E-03    |
| <i>motu linkage group 471</i>                                                | 3.33E-03       | 1.29E-02       | 3.62E-03                  | 1.17E-03    |
| <i>motu linkage group 520</i>                                                | 2.04E-03       | 9.29E-03       | 3.43E-03                  | 1.70E-03    |
| <i>Capnocytophaga sp. oral taxon 329</i>                                     | 6.97E-03       | 2.30E-02       | 3.41E-03                  | 1.25E-03    |

|                                     |          |          |          |          |
|-------------------------------------|----------|----------|----------|----------|
| <i>Clostridium sp. L2-50</i>        | 2.04E-04 | 1.42E-03 | 3.35E-03 | 4.08E-05 |
| <i>Bacteroides intestinalis</i>     | 9.35E-06 | 1.76E-04 | 3.31E-03 | 5.93E-04 |
| <i>motu linkage group 362</i>       | 4.25E-03 | 1.62E-02 | 3.26E-03 | 6.60E-04 |
| <i>motu linkage group 366</i>       | 1.21E-04 | 9.56E-04 | 3.26E-03 | 1.41E-03 |
| <i>butyrate-producing bacterium</i> | 1.24E-02 | 3.39E-02 | 3.20E-03 | 1.30E-02 |
| <i>Bacteroides finegoldii</i>       | 8.55E-05 | 6.95E-04 | 3.13E-03 | 5.80E-04 |
| <i>motu linkage group 70</i>        | 3.92E-04 | 2.51E-03 | 3.11E-03 | 9.45E-03 |
| <i>motu linkage group 254</i>       | 1.64E-03 | 7.86E-03 | 3.08E-03 | 6.71E-04 |
| <i>[Ruminococcus] torques</i>       | 1.76E-03 | 8.18E-03 | 3.02E-03 | 1.52E-02 |
| <i>Bifidobacterium adolescentis</i> | 7.08E-05 | 6.45E-04 | 2.89E-03 | 4.05E-02 |
| <i>motu linkage group 552</i>       | 1.06E-02 | 3.13E-02 | 2.85E-03 | 1.65E-03 |
| <i>motu linkage group 551</i>       | 1.83E-04 | 1.37E-03 | 2.84E-03 | 2.57E-03 |
| <i>Ruminococcus lactaris</i>        | 1.86E-05 | 2.18E-04 | 2.68E-03 | 9.22E-04 |
| <i>motu linkage group 394</i>       | 4.57E-04 | 2.70E-03 | 2.62E-03 | 8.65E-04 |
| <i>motu linkage group 456</i>       | 1.45E-05 | 2.07E-04 | 2.31E-03 | 8.44E-04 |
| <i>Odoribacter splanchnicus</i>     | 3.73E-06 | 8.63E-05 | 2.21E-03 | 7.71E-04 |
| <i>Bilophila wadsworthia</i>        | 1.28E-07 | 8.67E-06 | 2.21E-03 | 7.09E-04 |
| <i>Veillonella atypica</i>          | 1.25E-02 | 3.39E-02 | 2.19E-03 | 1.30E-03 |
| <i>Fusobacterium mortiferum</i>     | 3.33E-03 | 1.29E-02 | 2.17E-03 | 2.87E-04 |
| <i>motu linkage group 301</i>       | 1.09E-02 | 3.15E-02 | 1.90E-03 | 1.20E-03 |
| <i>Clostridium bolteae</i>          | 9.17E-08 | 8.67E-06 | 1.87E-03 | 1.24E-04 |
| <i>Eubacterium ventriosum</i>       | 1.87E-04 | 1.37E-03 | 1.86E-03 | 5.92E-04 |
| <i>motu linkage group 282</i>       | 1.60E-02 | 4.09E-02 | 1.82E-03 | 2.62E-04 |
| <i>motu linkage group 225</i>       | 1.05E-05 | 1.80E-04 | 1.78E-03 | 1.60E-03 |
| <i>motu linkage group 135</i>       | 1.01E-02 | 3.04E-02 | 1.73E-03 | 1.02E-03 |
| <i>Eubacterium siraeum</i>          | 2.87E-03 | 1.18E-02 | 1.67E-03 | 2.90E-04 |
| <i>motu linkage group 443</i>       | 1.50E-04 | 1.16E-03 | 1.63E-03 | 7.56E-04 |
| <i>motu linkage group 238</i>       | 4.47E-04 | 2.69E-03 | 1.59E-03 | 1.98E-04 |
| <i>motu linkage group 268</i>       | 1.21E-02 | 3.34E-02 | 1.58E-03 | 9.91E-05 |
| <i>Roseburia hominis</i>            | 1.65E-05 | 2.16E-04 | 1.53E-03 | 5.05E-04 |
| <i>motu linkage group 306</i>       | 9.72E-03 | 2.97E-02 | 1.51E-03 | 5.28E-04 |
| <i>Veillonella parvula</i>          | 5.71E-03 | 1.95E-02 | 1.47E-03 | 8.07E-03 |
| <i>motu linkage group 118</i>       | 4.99E-04 | 2.83E-03 | 1.46E-03 | 3.86E-04 |
| <i>Alistipes sp. HGB5</i>           | 1.22E-03 | 6.00E-03 | 1.42E-03 | 7.72E-04 |
| <i>motu linkage group 431</i>       | 1.46E-05 | 2.07E-04 | 1.32E-03 | 4.96E-04 |
| <i>Bacteroides clarus</i>           | 4.34E-03 | 1.63E-02 | 1.27E-03 | 1.90E-04 |
| <i>motu linkage group 415</i>       | 5.39E-03 | 1.89E-02 | 1.20E-03 | 2.64E-04 |
| <i>motu linkage group 507</i>       | 1.77E-03 | 8.18E-03 | 1.06E-03 | 5.65E-04 |
| <i>motu linkage group 274</i>       | 1.38E-02 | 3.65E-02 | 9.50E-04 | 8.81E-04 |
| <i>motu linkage group 470</i>       | 2.51E-05 | 2.60E-04 | 8.73E-04 | 1.14E-04 |
| <i>motu linkage group 646</i>       | 8.26E-03 | 2.67E-02 | 8.50E-04 | 2.45E-03 |
| <i>motu linkage group 145</i>       | 9.15E-03 | 2.87E-02 | 8.36E-04 | 1.55E-06 |
| <i>motu linkage group 573</i>       | 6.54E-04 | 3.52E-03 | 7.99E-04 | 1.24E-02 |
| <i>motu linkage group 624</i>       | 1.89E-05 | 2.18E-04 | 7.69E-04 | 5.56E-04 |
| <i>unclassified Lachnospiraceae</i> | 2.87E-03 | 1.18E-02 | 7.64E-04 | 5.82E-05 |

| <i>motu linkage group 651</i>              | 1.40E-02 | 3.68E-02 | 6.62E-04           | 3.25E-04 |
|--------------------------------------------|----------|----------|--------------------|----------|
| <i>Blautia hansenii</i>                    | 3.17E-03 | 1.27E-02 | 6.02E-04           | 9.63E-05 |
| <i>Megasphaera elsdenii</i>                | 3.21E-04 | 2.10E-03 | 5.49E-04           | 2.61E-03 |
| <i>motu linkage group 600</i>              | 3.22E-03 | 1.27E-02 | 5.09E-04           | 5.72E-05 |
| <i>motu linkage group 495</i>              | 1.09E-03 | 5.50E-03 | 4.64E-04           | 1.47E-04 |
| <i>motu linkage group 497</i>              | 6.25E-03 | 2.11E-02 | 4.61E-04           | 3.16E-04 |
| <i>motu linkage group 586</i>              | 2.89E-05 | 2.90E-04 | 4.55E-04           | 4.09E-05 |
| <i>motu linkage group 491</i>              | 9.09E-03 | 2.87E-02 | 4.48E-04           | 3.13E-04 |
| <i>Streptococcus vestibularis</i>          | 1.08E-05 | 1.80E-04 | 4.15E-04           | 8.84E-04 |
| <i>motu linkage group 517</i>              | 3.16E-04 | 2.10E-03 | 4.13E-04           | 1.77E-05 |
| <i>Enterobacter hormaechei/cloacae</i>     | 1.62E-02 | 4.10E-02 | 3.95E-04           | 1.09E-05 |
| <i>motu linkage group 672</i>              | 9.76E-03 | 2.97E-02 | 3.71E-04           | 2.02E-05 |
| <i>Streptococcus thermophilus</i>          | 2.09E-05 | 2.33E-04 | 3.43E-04           | 9.39E-04 |
| <i>Eggerthella lenta</i>                   | 1.45E-06 | 3.97E-05 | 3.28E-04           | 8.81E-05 |
| <i>Streptococcus sp. C150</i>              | 4.32E-04 | 2.67E-03 | 2.79E-04           | 2.98E-04 |
| <i>Lachnospiraceae bacterium 1 4 56FAA</i> | 6.83E-05 | 6.42E-04 | 2.67E-04           | 3.14E-05 |
| <i>Clostridium leptum</i>                  | 2.25E-03 | 9.83E-03 | 2.48E-04           | 1.03E-04 |
| <i>Holdemania filiformis</i>               | 7.30E-07 | 2.44E-05 | 2.38E-04           | 5.38E-05 |
| <i>Anaerotruncus colihominis</i>           | 4.08E-05 | 3.96E-04 | 2.20E-04           | 3.67E-05 |
| <i>Pseudoflavonifractor capillosus</i>     | 7.99E-05 | 6.87E-04 | 1.79E-04           | 5.14E-05 |
| <i>Oxalobacter formigenes</i>              | 4.82E-03 | 1.77E-02 | 1.75E-04           | 3.61E-05 |
| <i>motu linkage group 771</i>              | 9.15E-03 | 2.87E-02 | 1.62E-04           | 1.44E-06 |
| <i>motu linkage group 696</i>              | 1.13E-02 | 3.23E-02 | 1.53E-04           | 8.83E-05 |
| <i>Bifidobacterium breve</i>               | 1.45E-02 | 3.73E-02 | 1.40E-04           | 2.60E-03 |
| <i>Eubacterium dolichum</i>                | 2.53E-03 | 1.07E-02 | 1.35E-04           | 2.18E-06 |
| <i>Lactobacillus gasseri</i>               | 5.80E-04 | 3.17E-03 | 1.07E-04           | 3.23E-03 |
| <i>Streptococcus infantis</i>              | 4.82E-03 | 1.77E-02 | 9.30E-05           | 1.54E-04 |
| <i>Clostridium spiroforme</i>              | 1.05E-02 | 3.13E-02 | 9.29E-05           | 4.59E-05 |
| <i>motu linkage group 691</i>              | 1.15E-02 | 3.25E-02 | 9.06E-05           | 1.92E-05 |
| <i>Ruminococcaceae bacterium D16</i>       | 1.32E-02 | 3.51E-02 | 8.77E-05           | 4.59E-05 |
| <i>Clostridium scindens</i>                | 1.41E-03 | 6.86E-03 | 8.51E-05           | 2.71E-05 |
| <i>Streptococcus pneumoniae</i>            | 1.83E-02 | 4.55E-02 | 7.51E-05           | 1.45E-04 |
| <i>Lactobacillus amylovorus</i>            | 9.72E-03 | 2.97E-02 | 7.35E-05           | 1.26E-02 |
| <i>Acidaminococcus fermentans</i>          | 1.78E-02 | 4.47E-02 | 6.23E-05           | 5.00E-04 |
| <i>Bifidobacterium dentium</i>             | 5.14E-03 | 1.82E-02 | 5.83E-05           | 4.51E-04 |
| <i>Lactobacillus oris</i>                  | 2.11E-03 | 9.46E-03 | 4.40E-06           | 1.36E-03 |
| <i>Lactobacillus salivarius</i>            | 1.10E-03 | 5.50E-03 | 4.36E-06           | 2.39E-03 |
| <i>Streptococcus sp. M143</i>              | 1.45E-02 | 3.73E-02 | 1.65E-06           | 1.82E-05 |
| <i>Lactobacillus crispatus</i>             | 5.10E-03 | 1.82E-02 | 9.42E-07           | 6.58E-04 |
| <i>Lactobacillus rhamnosus</i>             | 1.10E-03 | 5.50E-03 | 0                  | 2.36E-03 |
| <b>Glipizide</b>                           |          |          |                    |          |
| mOTU ID                                    | P value  | q value  | Relative Abundance |          |
|                                            |          |          | Pre                | Post     |
| <i>Bacteroides eggerthii</i>               | 3.82E-02 | 9.70E-01 | 1.56E-02           | 9.04E-03 |
| <i>Megasphaera elsdenii</i>                | 1.43E-02 | 9.70E-01 | 6.43E-04           | 2.93E-04 |

|                               |          |          |          |          |
|-------------------------------|----------|----------|----------|----------|
| <i>motu linkage group 126</i> | 2.62E-02 | 9.70E-01 | 2.07E-03 | 4.38E-03 |
| <i>motu linkage group 151</i> | 3.72E-02 | 9.70E-01 | 5.46E-04 | 1.27E-03 |
| <i>motu linkage group 270</i> | 1.65E-02 | 9.70E-01 | 3.71E-03 | 8.80E-03 |

113 **Supplementary Table 7** PERMANOVA analysis of microbial genes and plasma BA species

114

| <b>Bile Acid</b> | <b>Sample Number</b> | <b>df</b> | <b>SumsOfSqs</b> | <b>MeanSqs</b> | <b>F.Model</b> | <b>R2</b> | <b>Pr(&gt;F)</b> | <b>q value</b> |
|------------------|----------------------|-----------|------------------|----------------|----------------|-----------|------------------|----------------|
| <b>UDCA</b>      | 91                   | 1         | 1.076            | 1.076          | 3.460          | 0.037     | 1.00E-04         | 5.00E-04       |
| <b>GUDCA</b>     | 91                   | 1         | 0.887            | 0.887          | 2.833          | 0.031     | 1.00E-04         | 5.00E-04       |
| <b>LCA</b>       | 91                   | 1         | 0.843            | 0.843          | 2.688          | 0.029     | 1.00E-04         | 5.00E-04       |
| <b>DCA</b>       | 91                   | 1         | 0.923            | 0.923          | 2.952          | 0.032     | 2.00E-04         | 7.50E-04       |
| <b>GLCA</b>      | 91                   | 1         | 0.544            | 0.544          | 1.715          | 0.019     | 6.90E-03         | 2.07E-02       |
| <b>TUDCA</b>     | 91                   | 1         | 0.497            | 0.497          | 1.565          | 0.017     | 2.14E-02         | 4.71E-02       |
| <b>CDCA</b>      | 91                   | 1         | 0.500            | 0.500          | 1.574          | 0.017     | 2.20E-02         | 4.71E-02       |
| <b>GCA</b>       | 91                   | 1         | 0.248            | 0.248          | 0.774          | 0.009     | 8.99E-01         | 9.76E-01       |
| <b>TCDC</b>      | 91                   | 1         | 0.236            | 0.236          | 0.736          | 0.008     | 9.44E-01         | 9.76E-01       |
| <b>GDCA</b>      | 91                   | 1         | 0.431            | 0.431          | 1.355          | 0.015     | 6.96E-02         | 1.31E-01       |
| <b>TCA</b>       | 91                   | 1         | 0.224            | 0.224          | 0.700          | 0.008     | 9.76E-01         | 9.76E-01       |
| <b>TLCA</b>      | 91                   | 1         | 0.386            | 0.386          | 1.210          | 0.013     | 1.47E-01         | 2.45E-01       |
| <b>TDCA</b>      | 91                   | 1         | 0.310            | 0.310          | 0.970          | 0.011     | 4.86E-01         | 7.28E-01       |
| <b>GCDCA</b>     | 91                   | 1         | 0.281            | 0.281          | 0.877          | 0.010     | 6.91E-01         | 9.42E-01       |
| <b>CA</b>        | 91                   | 1         | 0.269            | 0.269          | 0.839          | 0.009     | 7.69E-01         | 9.62E-01       |

115 CA, cholic acid; GCA, glycocholic acid; TCA, taurocholic acid

116 CDCA, chenodeoxycholic acid; TCDC, taurochenodeoxycholic acid; GCDCA, glycochenodeoxycholic acid

117 UDCA, ursodeoxycholic acid; TUDCA, tauroursodeoxycholic acid; GUDCA, glycooursodeoxycholic acid

118 DCA, deoxycholic acid; GDCA, glycodeoxycholic acid; TDCA, taurodeoxycholic acid

119 LCA, lithocholic acid; GLCA, glycolithocholic acid; TLCA; tauroolithocholic acid

120

121 **Supplementary Table 8** Annotation of bacterial genes involved in BA metabolism based on protein sequences associated with BA metabolism in the  
 122 UniProt database  
 123

| Gene                             | Enzyme    | KO     | Annotation                                                                           | Hit-keywords                                           | Number of reference | Number of annotated gene |
|----------------------------------|-----------|--------|--------------------------------------------------------------------------------------|--------------------------------------------------------|---------------------|--------------------------|
| <i>baiG</i>                      | NA        | NA     | Bile acid transporter                                                                | bile acid transporter                                  | 321                 | 1284                     |
| <i>bsh</i>                       | 3.5.1.24  | K01442 | Bile salt hydrolase                                                                  | EC 3.5.1.24; K01442                                    | 375                 | 1722                     |
| <i>baiB</i>                      | 6.2.1.7   | K15868 | Bile acid-CoA ligase                                                                 | EC 6.2.1.7; K15868                                     | 43                  | 417                      |
| <i>baiH</i>                      | NA        | K15873 | NAD(H)-dependent 7 $\beta$ -hydroxy-3-oxo- $\Delta$ 4-cholenoic acid oxidoreductase  | K15873                                                 | 1                   | 323                      |
| <i>baiA</i>                      | 1.1.1.395 | K15869 | 3 $\alpha$ -hydroxy bile acid-CoA-ester 3-dehydrogenase                              | EC 1.1.1.395; K15869                                   | 6                   | 1867                     |
| <i>baiCD</i>                     | NA        | K15870 | NAD(H)-dependent 7 $\alpha$ -hydroxy-3-oxo- $\Delta$ 4-cholenoic acid oxidoreductase | K15870                                                 | 2                   | 429                      |
| <i>baiF</i>                      | 3.1.2.26  | K15871 | Bile acid-CoA hydrolase                                                              | EC 3.1.2.26 (2.8.3.25); K15871                         | 33                  | 664                      |
| <i>baiI</i>                      | NA        | K15874 | Bile-acid 7 $\beta$ -dehydratase                                                     | K15874                                                 | 1                   | 20                       |
| <i>baiE</i>                      | 4.2.1.106 | K15872 | Bile acid 7- $\alpha$ dehydratase                                                    | EC 4.2.1.106; K15872                                   | 43                  | 68                       |
| <i>7<math>\alpha</math>-hsdh</i> | 1.1.1.159 | K00076 | 7 $\alpha$ -hydroxysteroid dehydrogenase                                             | EC 1.1.1.159; K00076                                   | 184                 | 9295                     |
| <i>7<math>\beta</math>-hsdh</i>  | 1.1.1.201 | NA     | 7 $\beta$ -hydroxysteroid dehydrogenase                                              | EC 1.1.1.201; 7 $\beta$ - hydroxysteroid dehydrogenase | 2                   | 13                       |
| <b>Total</b>                     |           |        |                                                                                      |                                                        | <b>1011</b>         | <b>16102</b>             |

124 BlastP parameters for gene annotation: E value < 1E-5 and bit score > 60.

125

126 **Supplementary Table 9** Comparison of the relative abundances of genes encoding enzymes involved in bacterial BA metabolism pre- and  
 127 post-treatment in both arms  
 128

| Gene             | Acarbose pre vs. post treatment |             |                |                             |          | Glipizide pre vs. post treatment |             |                             |          | Acarbose pre vs. Glipizide pre |             |                             |          |
|------------------|---------------------------------|-------------|----------------|-----------------------------|----------|----------------------------------|-------------|-----------------------------|----------|--------------------------------|-------------|-----------------------------|----------|
|                  | P value                         | Fold change | Enriched group | Median (relative abundance) |          | P value                          | Fold change | Median (relative abundance) |          | P value                        | Fold change | Median (relative abundance) |          |
|                  |                                 |             |                | pre                         | post     |                                  |             | pre                         | post     |                                |             | Acar                        | Glip     |
| <i>baiG</i>      | 6.66E-03                        | 0.868       | Post           | 2.61E-04                    | 2.96E-04 | 4.91E-01                         | 1.026       | 2.49E-04                    | 2.43E-04 | 8.67E-01                       | 1.024       | 2.61E-04                    | 2.49E-04 |
| <i>bsh</i>       | 4.51E-01                        | 0.926       | NS             | 3.12E-04                    | 3.05E-04 | 6.54E-01                         | 1.003       | 3.16E-04                    | 3.14E-04 | 8.20E-01                       | 1.021       | 3.12E-04                    | 3.16E-04 |
| <i>baiB</i> *    | 3.02E-04                        | 1.392       | Pre            | 1.10E-05                    | 6.33E-06 | 4.69E-01                         | 0.904       | 9.43E-06                    | 1.01E-05 | 5.04E-01                       | 1.050       | 1.10E-05                    | 9.43E-06 |
| <i>baiH</i> *    | 1.67E-01                        | 0.617       | NS             | 1.22E-05                    | 1.21E-05 | 2.57E-01                         | 0.884       | 1.11E-05                    | 1.30E-05 | 7.16E-01                       | 1.080       | 1.22E-05                    | 1.11E-05 |
| <i>baiA</i> *    | 1.06E-02                        | 0.825       | Pre            | 9.92E-04                    | 1.01E-03 | 7.42E-01                         | 0.970       | 1.71E-04                    | 1.81E-04 | 3.24E-01                       | 1.067       | 2.06E-04                    | 1.71E-04 |
| <i>baiCD</i> *   | 3.91E-01                        | 0.712       | NS             | 1.90E-05                    | 2.01E-05 | 1.05E-01                         | 0.896       | 1.76E-05                    | 2.03E-05 | 2.39E-01                       | 1.143       | 1.90E-05                    | 1.76E-05 |
| <i>baiF</i> *    | 2.30E-02                        | 1.032       | Pre            | 2.34E-05                    | 1.94E-05 | 6.20E-01                         | 0.963       | 2.39E-05                    | 2.40E-05 | 9.21E-01                       | 0.961       | 2.34E-05                    | 2.39E-05 |
| <i>baiI</i>      | 2.68E-03                        | 1.555       | Pre            | 1.10E-06                    | 1.10E-07 | 3.91E-01                         | 0.748       | 1.24E-06                    | 8.76E-07 | 5.53E-01                       | 0.774       | 1.10E-06                    | 1.24E-06 |
| <i>baiE</i>      | 1.09E-04                        | 2.929       | Pre            | 3.44E-06                    | 1.15E-06 | 8.03E-01                         | 1.562       | 3.78E-06                    | 3.28E-06 | 6.76E-01                       | 1.113       | 3.44E-06                    | 3.78E-06 |
| <i>7α-hsdh</i> * | 6.66E-03                        | 1.070       | Pre            | 1.23E-03                    | 1.13E-03 | 5.54E-01                         | 0.997       | 1.16E-03                    | 1.17E-03 | 9.65E-03                       | 1.070       | 1.23E-03                    | 1.16E-03 |
| <i>7β-hsdh</i>   | 5.68E-05                        | 0.236       | Post           | 1.50E-06                    | 2.63E-06 | 3.92E-01                         | 0.903       | 9.68E-07                    | 1.18E-06 | 3.39E-01                       | 1.497       | 1.50E-06                    | 9.68E-07 |

129 The symbol (\*) indicates the genes with inconsistent annotations using the KOALA (KEGG Orthology And Links Annotation) pipeline.

130 NS, not significant ( $P > 0.05$ ).

131

132 **Supplementary Table 10** Faecal bile acids pre-and post-treatment in the Acarbose arm

133

| Faecal bile acid (ng/g) | Pre-Treatment   | Post-Treatment  | P value<br>(Absolute value) | Pre-Treatment<br>(% of ABA) | Post-Treatment<br>(% of ABA) | P value<br>(% of ABA) |
|-------------------------|-----------------|-----------------|-----------------------------|-----------------------------|------------------------------|-----------------------|
| <b>Primary BAs</b>      |                 |                 |                             |                             |                              |                       |
| CA                      | 781.42±1110.84  | 752.1±881.29    | 7.96E-01                    | 9.79±13.34                  | 18.64±20.13                  | 1.33E-03              |
| CDCA                    | 638.36±933.5    | 603.98±868.9    | 4.22E-01                    | 8.12±9.79                   | 13.07±12.89                  | 2.97E-04              |
| GCA                     | 18.34±40.24     | 11.09±6.07      | 7.98E-02                    | 0.34±0.61                   | 0.42±0.33                    | 4.75E-03              |
| TCA                     | 22.84±43.4      | 17.24±24.42     | 5.72E-01                    | 0.37±0.5                    | 0.56±0.46                    | 4.19E-04              |
| TCDC                    | 21.46±23.62     | 15.77±6.4       | 3.75E-01                    | 0.33±0.32                   | 0.3±0.1                      | 4.32E-01              |
| GCDCA                   | 22.73±53.09     | 13.34±13.77     | 7.50E-02                    | 0.4±0.79                    | 0.45±0.33                    | 1.48E-02              |
| <b>Secondary BAs</b>    |                 |                 |                             |                             |                              |                       |
| UDCA                    | 1270.29±2079.42 | 954.03±1644.08  | 9.64E-01                    | 14.14±18.06                 | 19.26±18.33                  | 3.39E-02              |
| DCA                     | 1553.16±934.29  | 724.44±787.64   | 1.47E-05                    | 32.62±16.98                 | 26.04±19.77                  | 1.04E-02              |
| LCA                     | 1333.92±1010.54 | 539.54±637.42   | 1.98E-06                    | 28.64±18.58                 | 19.85±20.08                  | 4.05E-03              |
| GDCA                    | 24.38±26.61     | 15.87±3.59      | 3.88E-04                    | 0.51±0.45                   | 0.65±0.46                    | 3.31E-02              |
| 7KLCA                   | 111.49±156.93   | 51.33±55.78     | 2.66E-02                    | 1.33±1.27                   | 1.22±0.95                    | 3.79E-01              |
| 12KLCA                  | 259.35±232.37   | 131.77±149.32   | 2.14E-04                    | 5.26±3.7                    | 4.53±3.31                    | 1.18E-01              |
| <b>BA index</b>         |                 |                 |                             |                             |                              |                       |
| UnconBA/ConBA           | 74.18±38.18     | 62.65±40.97     | 5.53E-02                    |                             |                              |                       |
| 12α-OH/non 12α-OHBA     | 0.80±0.28       | 0.87±0.45       | 5.32E-01                    |                             |                              |                       |
| PBA/SBA                 | 0.40±0.66       | 1.46±2.9        | 5.20E-04                    |                             |                              |                       |
| ABA                     | 5962.77±3413.34 | 3740.42±2527.12 | 4.19E-05                    |                             |                              |                       |

134 Data are presented as mean ± SD; 100 samples had faecal BA profile determined. Unit of all BAs is ng/g dry faces

135 7KLCA, 7-ketolithocholic acid; 12KLCA, 12-ketolithocholic acid

136 UnconBA/ConBA = (CA + UDCA + CDCA + DCA + LCA+7KLCA+12KLCA) / (GCDCA + GDCA + GCA + TCA + TCDC)

137 12 α-OH/non12α-OHBA = (GCA+CA+TCA+GDCA+DCA) / (CDCA+TCDC+LCA+UDCA+GCDCA+7KLCA+12KLCA)

138 PBA/SBA = (GCDCA+ TCDC + CDCA + CA + TCA + GCA) / (UDCA + DCA + GDCA + LCA +7KLCA+12KLCA)



139  $ABA = GCDCA + TCDCA + CDCA + CA + TCA + GCA + UDCA + DCA + GDCA + LCA + 7KLCA + 12KLCA$

140 *P* value (Absolute value) indicates that the *P* values were calculated based on absolute values of faecal BAs.

141 *P* value (% of ABA) indicates that the *P* values were calculated based on percentage of each BA species in ABA.

142

143

144 **Supplementary Table 11** Comparison of baseline clinical indices in T2D patients stratified  
 145 according to the two distinct intestinal microbiome clusters: Cluster B vs. Cluster P  
 146

| Clinical index           | Unit              | P value  | Cluster B     | Cluster P      |
|--------------------------|-------------------|----------|---------------|----------------|
| Age                      | Years             | 6.39E-01 | 53.3 ± 6.6    | 53.7 ± 7.4     |
| Sex                      | Male/Total        | 7.25E-01 | 37/68         | 21/26          |
| BMI                      | kg/m <sup>2</sup> | 4.27E-01 | 26.2 ± 3.5    | 26.2 ± 2.7     |
| BW                       | kg                | 6.33E-01 | 72.8 ± 9.9    | 74.4 ± 12.1    |
| SBP                      | mmHg              | 5.23E-02 | 127 ± 16      | 135 ± 20       |
| DBP                      | mmHg              | 5.69E-01 | 81 ± 9        | 83 ± 11        |
| Waist circumference      | cm                | 3.82E-01 | 90.6 ± 7.7    | 92.5 ± 10.1    |
| WHR                      |                   | 7.30E-02 | 0.9 ± 0.1     | 0.9 ± 0.1      |
| HbA1c                    | %                 | 3.95E-01 | 7.7 ± 0.9     | 7.5 ± 0.7      |
| Blood Glucose level 0'   | mmol/L            | 9.17E-02 | 7.9 ± 1.4     | 7.3 ± 1.1      |
| Blood Glucose level 30'  | mmol/L            | 1.30E-01 | 10.9 ± 2      | 10.3 ± 1.9     |
| Blood Glucose level 60'  | mmol/L            | 2.57E-01 | 14.2 ± 2.4    | 13.8 ± 1.8     |
| Blood Glucose level 120' | mmol/L            | 2.43E-01 | 14.8 ± 2.9    | 14 ± 2.4       |
| Blood Glucose level 180' | mmol/L            | 7.42E-01 | 12.1 ± 3.2    | 11.5 ± 3       |
| AUCGlu                   | mmol/L*min        | 2.28E-01 | 2336 ± 377    | 2223 ± 310     |
| C Peptide 0'             | ng/mL             | 3.85E-01 | 1.2 ± 0.4     | 1.1 ± 0.5      |
| C Peptide 30'            | ng/mL             | 8.14E-01 | 1.7 ± 0.7     | 1.7 ± 0.7      |
| C Peptide 60'            | ng/mL             | 8.05E-01 | 2.6 ± 1.2     | 2.5 ± 1.2      |
| C Peptide 120'           | ng/mL             | 8.52E-01 | 3.9 ± 1.6     | 3.8 ± 1.4      |
| C Peptide 180'           | ng/mL             | 5.88E-01 | 3.6 ± 1.5     | 3.3 ± 1.1      |
| AUCCpep                  | ng/mL*min         | 8.14E-01 | 518 ± 189     | 509 ± 182      |
| Insulin 0'               | pmol/L            | 4.69E-01 | 82.5 ± 40.5   | 82.1 ± 58.4    |
| Insulin 30'              | pmol/L            | 8.11E-01 | 136.4 ± 67.8  | 139.1 ± 87.1   |
| Insulin 60'              | pmol/L            | 8.39E-01 | 240.4 ± 129.7 | 252.6 ± 182.7  |
| Insulin 120'             | pmol/L            | 7.42E-01 | 333.2 ± 171.7 | 363.3 ± 248.7  |
| Insulin 180'             | pmol/L            | 7.55E-01 | 282.6 ± 163.2 | 282.2 ± 179.1  |
| AUCIns                   | pmol/L*min        | 7.29E-01 | 969.8 ± 452.5 | 1036.3 ± 652.1 |
| Ins30/G30*               | uIU/mmol          | 4.80E-01 | 2 ± 3         | 2 ± 2          |
| HOMA β*                  | %                 | 6.72E-01 | 51 ± 30       | 58 ± 44        |
| HOMA IR*                 | uIU*mmol          | 2.07E-01 | 3.8 ± 2.1     | 3.4 ± 2.5      |
| TC                       | mmol/L            | 7.64E-01 | 5 ± 0.9       | 5.1 ± 1.5      |
| TG                       | mmol/L            | 4.79E-01 | 2.3 ± 1.6     | 2.3 ± 2.3      |
| LDL                      | mmol/L            | 3.41E-01 | 1.2 ± 0.5     | 1.2 ± 0.2      |
| HDL                      | mmol/L            | 9.74E-01 | 3.1 ± 0.8     | 3.2 ± 1.1      |
| APOA                     | g/L               | 9.94E-01 | 1.3 ± 0.2     | 1.4 ± 0.2      |
| APOB                     | g/L               | 9.24E-01 | 1 ± 0.2       | 1.1 ± 0.3      |
| AST                      | IU/L              | 8.21E-01 | 26.8 ± 12.4   | 32.5 ± 33.8    |
| AKP                      | IU/L              | 3.73E-03 | 68 ± 17.8     | 81.7 ± 21.7    |
| ALB                      | g/L               | 4.39E-01 | 46.8 ± 26.7   | 44.4 ± 4.2     |
| ALT                      | IU/L              | 7.71E-01 | 34.7 ± 20.2   | 39.3 ± 38.6    |

|                     |        |          |                       |                       |
|---------------------|--------|----------|-----------------------|-----------------------|
| $\gamma$ GT         | IU/L   | 2.20E-01 | 38.9 $\pm$ 37.5       | 48.1 $\pm$ 54.4       |
| FLI                 |        | 4.50E-01 | 284 $\pm$ 487         | 309 $\pm$ 435         |
| Uric acid           | umol/L | 3.89E-01 | 5 $\pm$ 1.2           | 5.2 $\pm$ 1           |
| Bun                 | mmol/L | 9.38E-01 | 301.2 $\pm$ 73.9      | 301.3 $\pm$ 65.5      |
| creatine            | umol/L | 4.24E-01 | 66.6 $\pm$ 14.8       | 69.2 $\pm$ 12.4       |
| IFN $\gamma$        | pg/mL  | 1.82E-01 | 45.6 $\pm$ 42.6       | 34.8 $\pm$ 17.1       |
| IL6                 | pg/mL  | 4.44E-02 | 3 $\pm$ 5             | 3 $\pm$ 4             |
| IL8                 | ng/mL  | 8.13E-01 | 17 $\pm$ 26           | 19 $\pm$ 25           |
| LPS binding protein | ng/mL  | 1.85E-01 | 20.6 $\pm$ 7.3        | 18.7 $\pm$ 8          |
| MCP1                | pg/mL  | 4.54E-01 | 244 $\pm$ 136         | 246 $\pm$ 78          |
| mpo                 | ng/mL  | 2.74E-01 | 386 $\pm$ 352         | 465 $\pm$ 363         |
| PAI1                | pg/mL  | 6.36E-01 | 57833 $\pm$ 21243     | 59240 $\pm$ 19940     |
| TNF $\alpha$        | pg/mL  | 2.93E-01 | 4.6 $\pm$ 2.2         | 5.7 $\pm$ 4.5         |
| CRP                 | ug/mL  | 3.10E-01 | 12 $\pm$ 16           | 21 $\pm$ 49           |
| Endothelin-1        | MFI    | 5.61E-01 | 12.8 $\pm$ 2.7        | 12.9 $\pm$ 3.4        |
| FetuinA             | ug/mL  | 7.90E-01 | 333.8 $\pm$ 50.2      | 332.6 $\pm$ 40.5      |
| FGF19               | MFI    | 8.03E-01 | 23 $\pm$ 4.1          | 23.3 $\pm$ 3.8        |
| FGF21               | MFI    | 5.37E-01 | 138.6 $\pm$ 60.8      | 156 $\pm$ 136         |
| FGF23               | MFI    | 1.32E-01 | 45.9 $\pm$ 9.3        | 42 $\pm$ 6.8          |
| Adiponectin         | pg/mL  | 6.33E-01 | 5307140 $\pm$ 3052570 | 6121582 $\pm$ 4297114 |
| Leptin              | pg/mL  | 7.32E-01 | 6491 $\pm$ 6637       | 6502 $\pm$ 5786       |

147 Data are presented as mean  $\pm$  SD; \* the Unit of insulin is converted to uIU/L

148 MFI, mean fluorescence intensity determined by using the Luminex 200™ instrument

149

150 **Supplementary Table 12** Comparison of baseline plasma bile acid profiles in T2D patients with two distinct intestinal  
 151 microbiome compositions: Cluster B vs. Cluster P

| Plasma bile acid<br>(nmol/L) | P value  | Fold<br>change | Median (nM) |           | Mean±SD (nM) |             |
|------------------------------|----------|----------------|-------------|-----------|--------------|-------------|
|                              |          |                | Cluster B   | Cluster P | Cluster B    | Cluster P   |
| DCA                          | 5.16E-03 | 0.543          | 113.48      | 208.88    | 143 ± 131    | 316 ± 294   |
| GDCA                         | 1.91E-02 | 0.531          | 177.02      | 333.18    | 372 ± 745    | 725 ± 1053  |
| UDCA                         | 2.84E-02 | 1.605          | 104.485     | 65.1      | 244 ± 350    | 98.9 ± 91.3 |
| LCA                          | 7.53E-03 | 0.786          | 11.4        | 14.51     | 12.5 ± 9.8   | 26.4 ± 25.8 |
| GLCA                         | 2.10E-02 | 0.518          | 3.525       | 6.81      | 7.1 ± 9.2    | 17.9 ± 35.5 |
| GCDCA                        | 9.68E-01 | 1.117          | 732.865     | 656.31    | 1063 ± 1329  | 1339 ± 1596 |
| GUDCA                        | 1.59E-01 | 1.325          | 66.645      | 50.29     | 137 ± 173    | 71.4 ± 67.2 |
| CA                           | 3.62E-01 | 1.099          | 47.82       | 43.52     | 117 ± 214    | 112 ± 186   |
| GCA                          | 7.25E-01 | 0.979          | 176.155     | 180.01    | 356 ± 673    | 450 ± 775   |
| TUDCA                        | 8.06E-02 | 1.608          | 5.9         | 3.67      | 17.7 ± 28.8  | 9.2 ± 16.1  |
| TCA                          | 1.68E-01 | 2.211          | 15.455      | 6.99      | 37.5 ± 71    | 38 ± 105    |
| CDCA                         | 4.16E-01 | 1.023          | 166.85      | 163.03    | 322 ± 402    | 220 ± 195   |
| TCDCa                        | 4.80E-01 | 1.097          | 57.84       | 52.72     | 106 ± 152    | 109 ± 210   |
| TDCA                         | 2.02E-01 | 0.733          | 12.985      | 17.72     | 31.6 ± 59    | 40.7 ± 79.9 |
| TLCA                         | 1.23E-01 | 0.625          | 3.56        | 5.7       | 6.4 ± 10.2   | 11.1 ± 22.7 |
| ABA                          | 7.79E-01 | 0.843          | 2083.12     | 2471.62   | 3222 ± 3412  | 3859 ± 4121 |
| SBA                          | 3.30E-01 | 0.722          | 673.03      | 932.42    | 971 ± 1013   | 1317 ± 1383 |
| PBA                          | 8.00E-01 | 0.988          | 1238.8      | 1254.17   | 2002 ± 2401  | 2268 ± 2735 |
| PBA/SBA                      | 3.79E-02 | 1.428          | 1.89        | 1.32      | 2.2 ± 1.2    | 1.8 ± 1.6   |
| UnconBA/ConBA                | 7.79E-01 | 0.922          | 0.40        | 0.44      | 0.6 ± 0.5    | 0.6 ± 0.5   |
| 12α-OH/non 12α-OHBA          | 8.17E-03 | 0.720          | 0.62        | 0.86      | 0.6 ± 0.4    | 0.9 ± 0.6   |
| ConBA                        | 7.86E-01 | 1.121          | 1292.835    | 1153.3    | 2135 ± 2999  | 2812 ± 3798 |
| BconBA                       | 3.04E-01 | 0.748          | 315.12      | 421.56    | 571 ± 887    | 875 ± 1217  |
| PconBA                       | 8.83E-01 | 1.136          | 1021.18     | 899.06    | 1563 ± 2178  | 1936 ± 2623 |
| UnconBA                      | 7.79E-01 | 0.846          | 498.99      | 589.89    | 838 ± 859    | 773 ± 591   |
| BunconBA                     | 5.31E-01 | 0.928          | 285.64      | 307.87    | 400 ± 342    | 442 ± 328   |
| PunconBA                     | 4.91E-01 | 0.980          | 209.125     | 213.46    | 439 ± 581    | 332 ± 340   |
| GlycinBA                     | 7.59E-01 | 1.091          | 1192.74     | 1092.79   | 1935 ± 2724  | 2603 ± 3417 |
| TaurineBA                    | 4.63E-01 | 0.905          | 102.655     | 113.44    | 199 ± 293    | 208 ± 429   |

152 ABA=UDCA + GCDCA + GDCA + GUDCA + CA + GCA + TUDCA + TCA + CDCA + DCA + TCDCA + TDCA + GLCA + LCA + TLCA  
153 SBA=UDCA + GUDCA + TUDCA + DCA + TDCA + GDCA + LCA + GLCA + TLCA  
154 PBA=GCDCA+ TCDCA + CDCA + CA + TCA + GCA  
155 PBA/SBA = GCDCA+ TCDCA + CDCA + CA + TCA + GCA)/(UDCA + GUDCA + TUDCA + DCA + TDCA + GDCA + LCA + GLCA + TLCA  
156 UnconBA/ConBA= CA + UDCA + CDCA + DCA + LCA)/(GCDCA + GDCA + GUDCA + GCA + TUDCA + TCA + TCDCA + TDCA + GLCA  
157 + TLCA  
158 12  $\alpha$ -OH/non12 $\alpha$ -OHBA = GCA+CA+TCA+GDCA+DCA+TDCA)/(TUDCA+CDCA+TCDCA+GLCA+LCA+UDCA+GCDCA+TLCA+GUDCA  
159 ConBA=GCDCA + GDCA + GUDCA + GCA + TUDCA + TCA + TCDCA + TDCA + GLCA + TLCA  
160 BconBA= GUDCA + TUDCA + TDCA + GDCA + GLCA + TLCA  
161 PconBA=GCDCA+ TCDCA + TCA + GCA  
162 UnconBA=CA + UDCA + CDCA + DCA + LCA  
163 BunconBA=UDCA + DCA + LCA  
164 PunconBA=CDCA + CA  
165 GlycinBA=GCDCA + GDCA + GUDCA + GCA + GLCA  
166 TaurineBA = TUDCA + TCA + TCDCA + TDCA + TLCA  
167

168 **Supplementary Table 13** Comparison of baseline faecal bile acid profiles in T2D patients in the Acarbose arm with two distinct  
 169 intestinal microbiome compositions: Cluster B vs. Cluster P  
 170

| Fecal bile acid (ng/g)                | Acarbose arm            |           |                |                   |           |                |
|---------------------------------------|-------------------------|-----------|----------------|-------------------|-----------|----------------|
|                                       | Median (Absolute value) |           |                | Median (% of ABA) |           |                |
|                                       | Cluster B               | Cluster P | <i>P</i> value | Cluster B         | Cluster P | <i>P</i> value |
| <b>Primary BAs</b>                    |                         |           |                |                   |           |                |
| CA                                    | 208.00                  | 21.87     | 3.69E-02       | 4.66              | 0.45      | 2.42E-02       |
| CDCA                                  | 351.99                  | 56.78     | 8.92E-02       | 6.52              | 1.07      | 5.18E-02       |
| GCA                                   | 9.67                    | 8.20      | 1.74E-01       | 0.21              | 0.21      | 9.53E-01       |
| TCA                                   | 11.29                   | 11.87     | 9.37E-01       | 0.28              | 0.26      | 9.55E-01       |
| TCDCA                                 | 12.86                   | 11.76     | 2.61E-01       | 0.19              | 0.29      | 6.93E-01       |
| GCDCA                                 | 10.95                   | 9.39      | 4.25E-01       | 0.22              | 0.23      | 7.79E-01       |
| <b>Secondary BAs</b>                  |                         |           |                |                   |           |                |
| UDCA                                  | 326.21                  | 43.34     | 9.66E-02       | 7.37              | 1.00      | 2.37E-02       |
| DCA                                   | 1552.04                 | 1757.16   | 1.95E-01       | 33.48             | 42.88     | 7.11E-02       |
| LCA                                   | 991.54                  | 1698.36   | 2.00E-02       | 26.91             | 43.84     | 1.35E-02       |
| GDCA                                  | 17.97                   | 18.42     | 6.36E-01       | 0.42              | 0.48      | 3.89E-01       |
| 7KLCA                                 | 86.82                   | 14.43     | 5.42E-02       | 1.01              | 0.40      | 2.72E-02       |
| 12KLCA                                | 177.06                  | 248.26    | 3.88E-01       | 4.51              | 5.75      | 3.88E-01       |
| <b>BA index</b>                       |                         |           |                |                   |           |                |
| UnconBA/ConBA                         | 68.77                   | 82.04     | 5.08E-01       |                   |           |                |
| 12 $\alpha$ -OH/non 12 $\alpha$ -OHBA | 0.74                    | 0.85      | 9.58E-02       |                   |           |                |
| PBA/SBA                               | 0.17                    | 0.02      | 2.42E-02       |                   |           |                |
| ABA                                   | 6157.32                 | 4542.35   | 1.10E-01       |                   |           |                |

171  
 172

173 **Supplementary Table 14** Comparison of baseline relative abundance profiles of genes encoding enzymes involved in BA metabolism  
 174 in T2D patients stratified according to the two distinct intestinal microbiome enterotype-like clusters: Cluster B vs. Cluster P  
 175

| Gene             | 94 baseline samples from 2 Clusters |                |             |                |                    |                    |
|------------------|-------------------------------------|----------------|-------------|----------------|--------------------|--------------------|
|                  | <i>P</i> value                      | <i>q</i> value | Fold change | Enriched group | Median (Cluster B) | Median (Cluster P) |
| <i>baiG</i>      | 3.69E-07                            | 5.43E-06       | 0.705       | Cluster P      | 2.33E-04           | 3.25E-04           |
| <i>bsh</i>       | 7.39E-13                            | 9.76E-11       | 1.572       | Cluster B      | 3.29E-04           | 2.13E-04           |
| <i>baiB</i> ※    | 9.09E-01                            | 9.09E-01       | 0.961       | NS             | 1.09E-05           | 1.09E-05           |
| <i>baiA</i> ※    | 8.74E-11                            | 2.88E-09       | 0.647       | Cluster P      | 1.65E-04           | 2.61E-04           |
| <i>baiCD</i> ※   | 2.74E-04                            | 2.26E-03       | 1.503       | Cluster B      | 2.10E-05           | 1.50E-05           |
| <i>baiH</i> ※    | 7.33E-04                            | 3.87E-03       | 1.436       | Cluster B      | 1.33E-05           | 8.60E-06           |
| <i>baiF</i> ※    | 1.80E-01                            | 2.16E-01       | 0.817       | NS             | 2.34E-05           | 2.85E-05           |
| <i>baiE</i>      | 1.59E-01                            | 2.16E-01       | 0.943       | NS             | 3.06E-06           | 3.55E-06           |
| <i>baiI</i>      | 9.80E-02                            | 1.80E-01       | 0.806       | NS             | 7.85E-07           | 1.42E-06           |
| <i>7α-hsdh</i> ※ | 2.54E-02                            | 5.98E-02       | 1.063       | NS             | 1.21E-03           | 1.14E-03           |
| <i>7β-hsdh</i>   | 6.58E-03                            | 2.07E-02       | 2.417       | Cluster B      | 1.41E-06           | 6.70E-07           |

176 The symbol (※) indicates the genes with inconsistent annotations by using the KOALA (KEGG Orthology And Links Annotation) pipeline.  
 177 NS, not significant ( $P > 0.05$ ).  
 178

179 **Supplementary Table 15** Comparison of clinical parameters altered by Acarbose and Glipizide treatments in patients stratified  
 180 according to baseline clustering of the gut microbiome  
 181

| Clinical index           | unit              | Acarbose      |               |          |                |               |          |
|--------------------------|-------------------|---------------|---------------|----------|----------------|---------------|----------|
|                          |                   | Cluster B     |               |          | Cluster P      |               |          |
|                          |                   | Pre           | Post          | P value  | Pre            | Post          | P value  |
| Age                      | years             | 53.6 ± 6.3    | 53.6 ± 6.3    | 1.00E+00 | 51.5 ± 7.9     | 51.5 ± 7.9    | 1.00E+00 |
| BMI                      | kg/m <sup>2</sup> | 26.4 ± 3.4    | 25.5 ± 3.5    | 3.26E-05 | 26.1 ± 2.9     | 25.1 ± 2.4    | 3.49E-03 |
| BW                       | kg                | 74.5 ± 9.3    | 71.9 ± 9.3    | 2.32E-05 | 75.4 ± 12.7    | 72.6 ± 12.2   | 3.67E-03 |
| Waist circumference      | cm                | 91.1 ± 7.4    | 88.5 ± 7.2    | 4.81E-03 | 92.3 ± 10.9    | 88.9 ± 8      | 3.00E-02 |
| WHR                      |                   | 0.9 ± 0       | 0.9 ± 0       | 3.63E-02 | 0.9 ± 0.1      | 0.9 ± 0.1     | 6.83E-02 |
| SBP                      | mmHg              | 127 ± 16.2    | 120.9 ± 14.3  | 1.23E-01 | 127.8 ± 15.2   | 119.8 ± 9.4   | 6.45E-02 |
| DBP                      | mmHg              | 82.1 ± 8.3    | 75.4 ± 8.6    | 1.95E-04 | 80.5 ± 8.8     | 74.9 ± 7      | 4.91E-02 |
| Blood Glucose level 0'   | mmol/L            | 7.9 ± 1.4     | 6.6 ± 0.9     | 2.34E-06 | 7 ± 0.8        | 6.7 ± 0.9     | 3.03E-01 |
| Blood Glucose level 30'  | mmol/L            | 10.7 ± 2.1    | 7.6 ± 1.5     | 4.07E-10 | 9.7 ± 1.6      | 7.6 ± 1.1     | 1.22E-04 |
| Blood Glucose level 60'  | mmol/L            | 14 ± 2.5      | 9.1 ± 2       | 5.82E-11 | 13.1 ± 1.6     | 9.1 ± 1.1     | 1.22E-04 |
| Blood Glucose level 120' | mmol/L            | 14.6 ± 2.9    | 9.2 ± 2       | 1.75E-07 | 13.3 ± 2.1     | 9.2 ± 1.4     | 6.10E-05 |
| Blood Glucose level 180' | mmol/L            | 11.7 ± 3      | 7.9 ± 2.2     | 7.36E-09 | 10.7 ± 2.9     | 7.8 ± 1.7     | 2.44E-04 |
| HbA1c                    | %                 | 7.6 ± 0.9     | 6.4 ± 0.5     | 3.54E-07 | 7.3 ± 0.6      | 6.3 ± 0.5     | 1.09E-03 |
| TC                       | mmol/L            | 5 ± 1         | 4.7 ± 1       | 5.94E-02 | 5.5 ± 1.6      | 4.9 ± 1.6     | 2.69E-02 |
| TG                       | mmol/L            | 2.5 ± 1.8     | 1.5 ± 1.1     | 6.66E-04 | 2.5 ± 3        | 1.7 ± 1.4     | 1.67E-02 |
| HDL                      | mmol/L            | 3 ± 0.8       | 3 ± 0.8       | 8.88E-01 | 3.3 ± 1.4      | 2.9 ± 1.3     | 1.10E-01 |
| LDL                      | mmol/L            | 1.1 ± 0.4     | 1.2 ± 0.4     | 1.22E-01 | 1.2 ± 0.2      | 1.2 ± 0.2     | 5.56E-01 |
| APOA                     | g/L               | 1.3 ± 0.2     | 1.2 ± 0.1     | 1.13E-02 | 1.4 ± 0.2      | 1.3 ± 0.2     | 1.25E-01 |
| APOB                     | g/L               | 1 ± 0.2       | 1 ± 0.2       | 4.24E-01 | 1.1 ± 0.4      | 0.9 ± 0.4     | 1.88E-01 |
| Insulin 0'               | pmol/L            | 85.1 ± 40     | 67.3 ± 48.9   | 9.63E-03 | 80.8 ± 56.8    | 71.6 ± 30.3   | 7.15E-01 |
| Insulin30'               | pmol/L            | 140.9 ± 76.3  | 96.8 ± 63.4   | 3.01E-03 | 134.3 ± 90.2   | 110.2 ± 41.5  | 1.73E-01 |
| Insulin 60'              | pmol/L            | 253 ± 137.4   | 153.8 ± 106.2 | 2.83E-04 | 271.2 ± 217.1  | 166.9 ± 72.8  | 3.53E-02 |
| Insulin120'              | pmol/L            | 346.5 ± 191.3 | 201.3 ± 118.6 | 3.16E-05 | 396.7 ± 289.6  | 236.4 ± 121.1 | 5.74E-02 |
| Insulin180'              | pmol/L            | 277.9 ± 164.8 | 157.9 ± 134   | 7.24E-06 | 306.7 ± 217.5  | 198.5 ± 105.6 | 6.76E-02 |
| AUC Ins                  | pmol/L*min        | 995.1 ± 482.8 | 608.9 ± 361.6 | 1.61E-05 | 1111.2 ± 762.5 | 715.3 ± 281.2 | 8.03E-02 |
| C Peptide 0'             | ng/mL             | 1.3 ± 0.5     | 1.1 ± 0.5     | 3.28E-03 | 1.1 ± 0.5      | 1.1 ± 0.4     | 5.83E-01 |



|                     |           |                   |                   |          |                   |                     |          |
|---------------------|-----------|-------------------|-------------------|----------|-------------------|---------------------|----------|
| C Peptide 30'       | ng/mL     | 1.8 ± 0.9         | 1.4 ± 0.6         | 4.56E-05 | 1.6 ± 0.8         | 1.4 ± 0.5           | 1.34E-02 |
| C Peptide 60'       | ng/mL     | 2.8 ± 1.3         | 1.9 ± 0.9         | 1.23E-04 | 2.5 ± 1.4         | 1.9 ± 0.9           | 6.10E-04 |
| C Peptide 120'      | ng/mL     | 4 ± 1.7           | 2.8 ± 1.2         | 3.16E-05 | 3.8 ± 1.5         | 2.7 ± 1             | 1.22E-04 |
| C Peptide 180'      | ng/mL     | 3.7 ± 1.7         | 2.5 ± 1.2         | 1.50E-06 | 3.3 ± 1.3         | 2.5 ± 1.3           | 2.45E-02 |
| AUCGlu              | mM*min    | 2299 ± 388        | 1525 ± 263        | 2.91E-11 | 2102 ± 254        | 1464 ± 270          | 6.10E-05 |
| AUCCpep             | ng/mL*min | 537 ± 215         | 384 ± 146         | 9.67E-06 | 507 ± 205         | 383 ± 139           | 3.66E-04 |
| HOMA IR*            | uIU*mmol  | 4 ± 2.3           | 2.6 ± 2           | 1.03E-03 | 3.2 ± 2.2         | 2.7 ± 1.2           | 7.15E-01 |
| HOMA β*             | %         | 51.4 ± 23.5       | 58 ± 43.6         | 7.65E-01 | 60 ± 46.1         | 65 ± 45.6           | 5.42E-01 |
| ΔIns30/G30*         | uIU/mmol  | 2.1 ± 3.7         | 33 ± 115          | 1.24E-02 | 2.6 ± 2.9         | 27 ± 102            | 6.35E-01 |
| Bun                 | mmol/L    | 309.3 ± 76.8      | 329.2 ± 58.9      | 1.71E-02 | 306.2 ± 67.2      | 326.5 ± 65.9        | 2.21E-01 |
| creatinine          | umol/L    | 67.1 ± 15.8       | 67.6 ± 16         | 5.31E-01 | 68 ± 10.6         | 67.4 ± 10.4         | 1.00E+00 |
| Uric acid           | umol/L    | 4.9 ± 1           | 4.7 ± 1.4         | 2.06E-01 | 5.1 ± 1.1         | 5 ± 1.2             | 7.01E-01 |
| FLI                 |           | 315 ± 570         | 103 ± 167         | 1.76E-06 | 387 ± 529         | 94.9 ± 82.8         | 9.77E-04 |
| AKP                 | IU/L      | 68.4 ± 20.9       | 59.2 ± 18.9       | 2.98E-04 | 85.4 ± 24.7       | 77.5 ± 24.9         | 1.49E-01 |
| ALB                 | g/L       | 49.8 ± 37.5       | 42.3 ± 2.6        | 5.29E-02 | 45.6 ± 4.8        | 44.4 ± 3.7          | 1.26E-01 |
| ALT                 | IU/L      | 37.7 ± 21.9       | 29.4 ± 21.1       | 2.39E-02 | 40.7 ± 37.8       | 44.4 ± 61.1         | 3.15E-01 |
| γGT                 | IU/L      | 42.8 ± 47         | 24.8 ± 16.9       | 5.29E-05 | 60.1 ± 67.7       | 43.1 ± 56.1         | 2.03E-02 |
| AST                 | IU/L      | 28.2 ± 12.3       | 22.5 ± 9.8        | 9.26E-03 | 35.9 ± 41.6       | 29.4 ± 24           | 1.84E-01 |
| LPS binding protein | ng/mL     | 19.6 ± 5.8        | 17.4 ± 6.6        | 3.17E-01 | 15.4 ± 5          | 17.6 ± 5.9          | 3.91E-01 |
| Adiponectin         | pg/ml     | 4659142 ± 3197330 | 5157340 ± 2775458 | 9.07E-03 | 6825516 ± 5265272 | 10063264 ± 10737091 | 7.30E-02 |
| Leptin              | pg/mL     | 6319 ± 6148       | 6481 ± 9720       | 1.58E-01 | 7201 ± 6297       | 4522 ± 2763         | 6.71E-03 |
| CRP                 | ug/mL     | 13.6 ± 17.5       | 30 ± 75.1         | 8.53E-01 | 10.2 ± 8.4        | 19.6 ± 27.3         | 2.29E-01 |
| Endothelin-1        | pg/mL     | 12.4 ± 2.4        | 13.4 ± 2.8        | 3.01E-02 | 13.7 ± 4.1        | 14.3 ± 2.8          | 2.08E-01 |
| MCP1                | pg/mL     | 245.5 ± 93.8      | 256.6 ± 91.8      | 6.96E-02 | 212 ± 75.3        | 252.8 ± 89.7        | 6.71E-03 |
| mpo                 | ng/mL     | 366 ± 358         | 276 ± 223         | 5.43E-01 | 411 ± 344         | 467 ± 409           | 1.00E+00 |
| PAI1                | pg/mL     | 56210 ± 19392     | 52770 ± 20498     | 7.10E-01 | 54085 ± 15520     | 61007 ± 26493       | 2.52E-01 |
| TNF α               | pg/mL     | 4.7 ± 2.1         | 4.8 ± 2.4         | 8.78E-01 | 4 ± 2             | 4.6 ± 1.9           | 7.82E-02 |
| IFNγ                | pg/mL     | 38.8 ± 23.1       | 42.1 ± 24         | 2.59E-01 | 37.6 ± 20.2       | 38.8 ± 12.9         | 6.09E-01 |
| IL6                 | pg/mL     | 2.6 ± 5.2         | 4.8 ± 9.8         | 3.46E-01 | 1.6 ± 0.8         | 2.7 ± 2.4           | 1.29E-01 |
| IL8                 | ng/mL     | 15.1 ± 21.8       | 11.9 ± 17.8       | 6.48E-01 | 9.6 ± 9.6         | 15.4 ± 24.9         | 4.63E-01 |
| FGF19               | MFI       | 22.4 ± 4.3        | 19.7 ± 4.7        | 7.21E-04 | 22.6 ± 3.7        | 19.3 ± 3            | 6.27E-03 |
| FGF21               | MFI       | 143 ± 64.9        | 100.1 ± 65.8      | 2.00E-04 | 136.4 ± 79.7      | 97.9 ± 41.5         | 2.62E-03 |

|                          |                   |                  |             |                |                  |              |                |
|--------------------------|-------------------|------------------|-------------|----------------|------------------|--------------|----------------|
| FGF23                    | MFI               | 44.9 ± 6.7       | 37.1 ± 10.2 | 5.55E-05       | 42.4 ± 6.6       | 43.5 ± 6.4   | 6.29E-01       |
| CA                       | nmol/L            | 109.2±145        | 214±260     | 0.018677421    | 76.7±95.3        | 204.9±263.5  | 0.049438477    |
| CDCA                     | nmol/L            | 320.6±365        | 687.7±527.3 | 0.000781945    | 238.4±208        | 659±623.3    | 0.013427734    |
| GCA                      | nmol/L            | 302.1±429.9      | 272.7±499.1 | 0.02732318     | 525.3±968.6      | 191.3±179.2  | 0.104003906    |
| GDCA                     | nmol/L            | 331.2±539        | 134.2±298.9 | 0.006609388    | 810.7±1210.2     | 276.3±255.6  | 0.104003906    |
| TCA                      | nmol/L            | 34±54.1          | 25.1±53.1   | 0.00432581     | 56.3±138.2       | 13.2±10.2    | 0.153076172    |
| TDCA                     | nmol/L            | 31.7±59.5        | 10±14.2     | 0.001115285    | 55±105           | 19±17        | 0.153076172    |
| TLCA                     | nmol/L            | 5.4±7.4          | 3.2±4.1     | 0.023753465    | 14.7±30          | 5.7±4.1      | 0.71484375     |
| TUDCA                    | nmol/L            | 17.5±29.5        | 8±8.6       | 0.041045422    | 13±20.8          | 6.9±6.8      | 0.426269531    |
| <b>Clinical index</b>    | <b>Unit</b>       | <b>Glipizide</b> |             |                |                  |              |                |
|                          |                   | <b>Cluster B</b> |             |                | <b>Cluster P</b> |              |                |
|                          |                   | <b>Pre</b>       | <b>Post</b> | <b>P value</b> | <b>Pre</b>       | <b>Post</b>  | <b>P value</b> |
| Age                      | Years             | 53 ± 7           | 53 ± 7      | 1.00E+00       | 56.8 ± 5.6       | 56.8 ± 5.6   | 1.00E+00       |
| BMI                      | kg/m <sup>2</sup> | 25.9 ± 3.6       | 25.7 ± 3.6  | 2.84E-01       | 26.4 ± 2.7       | 25.7 ± 2.3   | 3.20E-01       |
| BW                       | kg                | 70.9 ± 10.4      | 70.3 ± 10.2 | 2.94E-01       | 73.2 ± 11.8      | 71.3 ± 10.8  | 3.48E-01       |
| Waist circumference      | cm                | 90 ± 8.1         | 89.3 ± 8.2  | 4.45E-01       | 92.9 ± 9.2       | 90 ± 9.4     | 1.71E-01       |
| WHR                      |                   | 0.9 ± 0.1        | 0.9 ± 0     | 6.88E-02       | 0.9 ± 0          | 0.9 ± 0.1    | 1.41E-01       |
| SBP                      | mmHg              | 126.3 ± 15.3     | 125 ± 14.8  | 3.46E-01       | 144.6 ± 21.8     | 126.5 ± 14.2 | 5.37E-02       |
| DBP                      | mmHg              | 79.5 ± 8.6       | 76.3 ± 8.7  | 7.08E-02       | 85.4 ± 13.6      | 75.6 ± 10.7  | 9.10E-02       |
| Blood Glucose level 0'   | mmol/L            | 7.9 ± 1.4        | 6.7 ± 1.3   | 5.16E-05       | 7.7 ± 1.4        | 6.6 ± 0.9    | 1.44E-02       |
| Blood Glucose level 30'  | mmol/L            | 11.1 ± 1.8       | 9 ± 2.4     | 1.04E-04       | 11.1 ± 2         | 8.8 ± 1.8    | 9.77E-03       |
| Blood Glucose level 60'  | mmol/L            | 14.5 ± 2.4       | 11.5 ± 2.6  | 8.10E-07       | 14.7 ± 1.9       | 11.5 ± 1.8   | 4.88E-03       |
| Blood Glucose level 120' | mmol/L            | 14.9 ± 2.9       | 10.9 ± 2.7  | 2.08E-07       | 15 ± 2.5         | 10.6 ± 3.1   | 1.95E-03       |
| Blood Glucose level 180' | mmol/L            | 12.6 ± 3.4       | 8.8 ± 3     | 3.55E-07       | 12.7 ± 3         | 9.2 ± 3.4    | 9.77E-04       |
| HbA1c                    | %                 | 7.7 ± 1          | 6.3 ± 0.7   | 1.33E-06       | 7.7 ± 0.8        | 6.2 ± 0.7    | 3.84E-03       |
| TC                       | mmol/L            | 5.1 ± 0.9        | 4.9 ± 0.8   | 4.77E-01       | 4.5 ± 1.3        | 4.5 ± 0.8    | 3.20E-01       |
| TG                       | mmol/L            | 2.1 ± 1.2        | 1.8 ± 0.9   | 7.05E-01       | 2 ± 1.2          | 1.5 ± 0.6    | 3.65E-01       |
| HDL                      | mmol/L            | 3.1 ± 0.8        | 2.9 ± 0.8   | 1.25E-01       | 3 ± 0.5          | 2.7 ± 0.7    | 1.23E-01       |
| LDL                      | mmol/L            | 1.2 ± 0.5        | 1.3 ± 0.7   | 7.76E-01       | 1.2 ± 0.2        | 1.3 ± 0.3    | 9.97E-02       |
| APOA                     | g/L               | 1.4 ± 0.2        | 1.3 ± 0.2   | 4.94E-01       | 1.3 ± 0.1        | 1.2 ± 0.2    | 2.50E-01       |
| APOB                     | g/L               | 1 ± 0.2          | 1 ± 0.2     | 5.88E-01       | 1 ± 0.1          | 0.9 ± 0.1    | 2.50E-01       |
| Insulin 0'               | pmol/L            | 79.6 ± 41.3      | 77.1 ± 44.4 | 9.34E-01       | 83.9 ± 63        | 73.9 ± 61.5  | 4.65E-01       |

|                     |            |                   |                   |          |                   |                   |          |
|---------------------|------------|-------------------|-------------------|----------|-------------------|-------------------|----------|
| Insulin30'          | pmol/L     | 131.6 ± 58        | 197.3 ± 114.3     | 4.89E-05 | 145.9 ± 86.8      | 184.8 ± 111.9     | 1.75E-01 |
| Insulin 60'         | pmol/L     | 226.3 ± 120.9     | 290.7 ± 183       | 6.22E-03 | 227.3 ± 127.8     | 261.7 ± 142.9     | 4.13E-01 |
| Insulin120'         | pmol/L     | 319.1 ± 149.8     | 391.6 ± 238.2     | 5.29E-02 | 318.1 ± 181.8     | 342.2 ± 179.3     | 7.00E-01 |
| Insulin180'         | pmol/L     | 287.6 ± 164.1     | 318.9 ± 158.3     | 1.44E-01 | 249.2 ± 109.2     | 282.6 ± 207.5     | 5.77E-01 |
| AUC Ins             | pmol/L*min | 942.3 ± 422.6     | 1172.2 ± 630.4    | 1.25E-02 | 934.2 ± 478.9     | 1044.9 ± 558.6    | 5.77E-01 |
| C Peptide 0'        | ng/mL      | 1.1 ± 0.3         | 1.1 ± 0.3         | 9.34E-01 | 1.2 ± 0.5         | 1.1 ± 0.6         | 2.06E-01 |
| C Peptide 30'       | ng/mL      | 1.5 ± 0.5         | 2.1 ± 0.6         | 1.73E-06 | 1.8 ± 0.6         | 2.1 ± 0.9         | 1.75E-01 |
| C Peptide 60'       | ng/mL      | 2.4 ± 0.9         | 2.9 ± 0.8         | 2.61E-04 | 2.5 ± 0.9         | 2.9 ± 1.3         | 4.13E-01 |
| C Peptide 120'      | ng/mL      | 3.8 ± 1.3         | 4.2 ± 1.5         | 5.21E-02 | 3.8 ± 1.3         | 4.1 ± 1.4         | 2.40E-01 |
| C Peptide 180'      | ng/mL      | 3.6 ± 1.3         | 3.8 ± 1.1         | 3.32E-01 | 3.3 ± 0.9         | 3.9 ± 1.5         | 9.98E-02 |
| AUCGlu              | mmol/L*min | 2379 ± 368        | 1808 ± 373        | 4.10E-08 | 2388 ± 315        | 1793 ± 333        | 1.95E-03 |
| AUCCpep             | ng/mL*min  | 497 ± 156         | 575 ± 152         | 6.48E-03 | 512 ± 154         | 575 ± 195         | 2.40E-01 |
| HOMA IR*            | uIU*mmol   | 3.5 ± 1.8         | 3 ± 1.9           | 1.06E-01 | 3.7 ± 2.8         | 2.9 ± 2.6         | 1.47E-01 |
| HOMA β*             | %          | 51.5 ± 36.2       | 74.5 ± 67.5       | 9.34E-03 | 55.2 ± 43.1       | 60.4 ± 42         | 7.00E-01 |
| ΔIns30/G30*         | uIU/mmol   | 2 ± 1.9           | 11.6 ± 17.3       | 1.29E-06 | 2.2 ± 1.7         | 9.2 ± 9.4         | 9.77E-03 |
| Bun                 | mmol/L     | 292 ± 70.6        | 290.7 ± 49.9      | 7.19E-01 | 293.9 ± 65.5      | 305.6 ± 53.8      | 2.75E-01 |
| creatinine          | umol/L     | 66 ± 13.7         | 64.7 ± 11.9       | 9.04E-01 | 70.9 ± 15.2       | 70.5 ± 15.8       | 5.75E-01 |
| Uric acid           | umol/L     | 5.1 ± 1.4         | 5.1 ± 1.5         | 8.82E-01 | 5.5 ± 1           | 5.2 ± 1.4         | 9.59E-01 |
| FLI                 |            | 247 ± 367         | 174 ± 289         | 1.35E-01 | 208 ± 266         | 129 ± 226         | 8.40E-02 |
| AKP                 | IU/L       | 67.6 ± 14.1       | 64.3 ± 14.4       | 1.84E-01 | 76.1 ± 15.7       | 71.3 ± 22.4       | 3.65E-02 |
| ALB                 | g/L        | 43.8 ± 3          | 43.6 ± 3.4        | 7.84E-01 | 42.7 ± 2.6        | 42.8 ± 3.3        | 6.08E-01 |
| ALT                 | IU/L       | 31.5 ± 17.8       | 25.3 ± 12.3       | 5.72E-02 | 37.5 ± 41.5       | 20.4 ± 6          | 2.84E-01 |
| γGT                 | IU/L       | 34.5 ± 22.4       | 29.7 ± 24.2       | 9.75E-02 | 30.2 ± 12.6       | 22.6 ± 18         | 1.05E-01 |
| AST                 | IU/L       | 25.2 ± 12.5       | 21.2 ± 5.8        | 1.12E-01 | 27.7 ± 19.9       | 19.6 ± 3.1        | 2.33E-01 |
| LPS binding protein | ng/mL      | 21.8 ± 8.7        | 18.1 ± 4.7        | 2.12E-02 | 22.8 ± 9.3        | 20.6 ± 9.3        | 7.65E-01 |
| Adiponectin         | pg/mL      | 6036138 ± 2749742 | 6253072 ± 3047519 | 4.10E-01 | 5161672 ± 2365119 | 4741547 ± 2665058 | 7.65E-01 |
| Leptin              | pg/mL      | 6690 ± 7262       | 7575 ± 7318       | 3.21E-02 | 5614 ± 5218       | 3316 ± 1930       | 1.47E-01 |
| CRP                 | ug/mL      | 10.1 ± 13.9       | 10.3 ± 8.1        | 2.95E-01 | 36.2 ± 74.8       | 18.6 ± 20.1       | 7.65E-01 |
| Endothelin-1        | pg/mL      | 13.3 ± 3          | 13.7 ± 3.8        | 4.10E-01 | 11.7 ± 1.6        | 12.2 ± 2.1        | 5.38E-01 |
| MCP1                | pg/mL      | 243 ± 174         | 255 ± 174         | 1.60E-01 | 293.3 ± 55        | 287.1 ± 86.3      | 7.00E-01 |
| mpo                 | ng/mL      | 407 ± 349         | 342 ± 417         | 4.75E-02 | 537 ± 393         | 340 ± 215         | 3.20E-01 |
| PAI1                | pg/mL      | 59660 ± 23329     | 56888 ± 22053     | 3.60E-01 | 66270 ± 23718     | 49399 ± 18460     | 6.74E-02 |

|              |        |                   |                    |             |                   |                   |             |
|--------------|--------|-------------------|--------------------|-------------|-------------------|-------------------|-------------|
| TNF $\alpha$ | pg/mL  | 4.5 $\pm$ 2.3     | 4.3 $\pm$ 1.9      | 4.45E-01    | 8 $\pm$ 5.8       | 5.9 $\pm$ 3.4     | 1.02E-01    |
| IFN $\gamma$ | pg/mL  | 53.2 $\pm$ 56.6   | 53.7 $\pm$ 54      | 6.88E-01    | 30.9 $\pm$ 11.6   | 33.7 $\pm$ 9.7    | 8.31E-01    |
| IL6          | pg/mL  | 3.2 $\pm$ 5.5     | 1.9 $\pm$ 2.1      | 4.15E-02    | 4.6 $\pm$ 4.8     | 1.6 $\pm$ 1.4     | 3.91E-03    |
| IL8          | ng/mL  | 19.3 $\pm$ 30.8   | 12.9 $\pm$ 19      | 1.46E-01    | 30.2 $\pm$ 33.2   | 7.8 $\pm$ 11.1    | 8.30E-02    |
| FGF19        | MFI    | 23.7 $\pm$ 3.9    | 21.2 $\pm$ 5.2     | 1.43E-02    | 24.2 $\pm$ 3.9    | 21.9 $\pm$ 3.7    | 4.92E-02    |
| FGF21        | MFI    | 133.6 $\pm$ 56.5  | 132.1 $\pm$ 72.5   | 7.93E-01    | 182 $\pm$ 190     | 116.9 $\pm$ 85.7  | 2.59E-02    |
| FGF23        | MFI    | 47 $\pm$ 11.5     | 44.9 $\pm$ 15.5    | 4.87E-02    | 41.4 $\pm$ 7.2    | 37.8 $\pm$ 7.1    | 6.15E-02    |
| CA           | nmol/L | 126 $\pm$ 274.9   | 130.2 $\pm$ 226.6  | 0.444234281 | 156 $\pm$ 259     | 86.9 $\pm$ 86.9   | 0.965820313 |
| CDCA         | nmol/L | 322.8 $\pm$ 446   | 455.6 $\pm$ 1000.9 | 0.900083351 | 196.6 $\pm$ 184.7 | 220.7 $\pm$ 162.4 | 0.637695313 |
| GCA          | nmol/L | 417.5 $\pm$ 873.6 | 244 $\pm$ 404.3    | 0.052696118 | 353.9 $\pm$ 453.1 | 574.9 $\pm$ 1001  | 0.637695313 |
| GDCA         | nmol/L | 418.4 $\pm$ 931.8 | 313.6 $\pm$ 415.5  | 0.363786061 | 616.6 $\pm$ 856.2 | 735.2 $\pm$ 841.1 | 0.206054688 |
| TCA          | nmol/L | 41.4 $\pm$ 87.1   | 27.3 $\pm$ 67      | 0.255575756 | 14.5 $\pm$ 20.1   | 45.5 $\pm$ 82     | 0.1015625   |
| TDCA         | nmol/L | 31.4 $\pm$ 59.4   | 23.4 $\pm$ 27.1    | 0.594814425 | 22.6 $\pm$ 18.6   | 52.7 $\pm$ 58.2   | 0.1015625   |
| TLCA         | nmol/L | 7.6 $\pm$ 12.7    | 5.3 $\pm$ 4.7      | 0.839255622 | 6.4 $\pm$ 4.7     | 10.8 $\pm$ 10     | 0.278320313 |
| TUDCA        | nmol/L | 17.9 $\pm$ 28.4   | 10.1 $\pm$ 13.4    | 0.098183046 | 4.3 $\pm$ 3.7     | 8.6 $\pm$ 12.3    | 0.46484375  |
| TaurinBA     | nmol/L | 203.1 $\pm$ 327.4 | 137.2 $\pm$ 194.2  | 0.151658527 | 105.3 $\pm$ 80.9  | 258.2 $\pm$ 346.8 | 0.067382813 |

182 MFI, mean fluorescence intensity determined by using the Luminex 200™ instrument. \*, the unit of insulin is converted to uIU/L

183

## 184 **Supplementary Methods**

### 185 **Screening, recruitment, dietary information and follow-up**

186 171 Han Chinese patients with T2D were screened at baseline. The detailed inclusion and exclusion criteria are listed in

187 **Supplementary Table 1**. Briefly, the eligibility criteria were as follows: 1) newly onset, treatment-naïve T2D patients diagnosed

188 according to the 1999 World Health Organization criteria with fasting plasma glucose  $\geq$ 7 mmol/L and/or an oral glucose tolerance test

189 (OGTT) 2 h  $\geq$ 11.1 mmol/L; 2) fasting glucose levels  $<$ 13.0 mmol/L and HbA1c  $\leq$  10%; and 3) BMI  $\leq$ 35 kg/m<sup>2</sup>. The exclusion criteria

190 were: 1) severe digestive diseases that might cause severe constipation or chronic or acute diarrhoea; 2) gastroenterological or other

191 abdominal surgeries such as cholecystectomy within one year; 3) severe hepatic and renal failure (ALT $>$ =2.5-fold above the normal

192 range and  $\text{Scr} \geq 132 \mu\text{mol/L}$ ); 4) psychiatric disorders, severe infectious diseases, severe anaemia, or severe neutropenia; 5) severe  
193 cardiac diseases or cardiac function evaluation  $\geq$ NYHA Class III; 6) acute diabetic ketonuria acidosis and hyperosmotic coma within  
194 3 months; 7) past history of antidiabetic drug administration; and 8) treatment with antibiotics during the past 3 months.

195 Acarbose (Bayer HealthCare, Wuppertal, Germany) or Glipizide (Sine Pharm. Corp, Shanghai, China) was administered after a  
196 one-day run-in preparation. All the enrolled patients completed a physical examination and questionnaires for diet, lifestyle and  
197 history of disease and medication use. For Acarbose, the initial dose was 75 mg/day, 25 mg per meal, 3 times a day and, and the dose  
198 was increased to 300-450 mg/day, 100-150 mg per meal, 3 times a day within one month. For Glipizide, the initial dose was 5 mg/day,  
199 2.5 mg pre-meal, twice a day, and the dose was increased to 15 mg/day, 5 mg pre-meal, 3 times per day. Patients were instructed to  
200 avoid ingesting yogurt and antibiotics or to keep record of prescriptions if necessary during the follow-up.

201 Dietary intake was recorded by a food frequency query (FFQ) based on the SLAN study<sup>1</sup>, using a Chinese translated version.  
202 Primarily, the distribution of vegetarian or non-vegetarian and dairy-food consumer or non-dairy-food consumer did not differ  
203 between the two arms at baseline (Pearson's Chi-squared test,  $P > 0.05$ ). The frequencies of vegetable, meat, fish, sweets intakes, and  
204 the frequencies of eating out were similar in patients belonging to the two treatment arms pre- and post-treatment (Kruskal-Wallis  
205 rank sum test,  $P > 0.05$ ). These dietary features of patients in both arms showed no significant changes after treatment (Kruskal-Wallis  
206 rank sum test,  $P > 0.05$ ).

207

208

209 **Functional annotation of genes involved in BA synthesis based on BLASTP and BlastKOALA**

210 To identify genes involved in bile acid metabolism, we performed a BlastP search against 1,011 amino acid sequences annotated as  
211 enzymes involved in BA metabolism in the UniProt database using an E value  $<1E-5^2$  and bit score  $>60^{3,4}$ . This resulted in 16,102  
212 genes potentially involved in bile acid metabolism. We next assessed the 16,102 potential hits against KEGG using the KEGG online  
213 BlastKOALA algorithm<sup>5</sup>. As shown in **Supplementary Data 4**, the genes annotated to *bsh*, *baiE* and *baiI* by our pipeline showed  
214 high consistency with the KEGG online results, with 69%-85% genes annotated to the same KO. For genes annotated to *baiG* (bile  
215 acid transporter), 72.2% were assigned to K03453 (bile acid:Na<sup>+</sup> symporter, BASS family), although no KO was reported and  
216 assigned to *baiG*. For genes annotated to *7β-hsdh* by our pipeline, 92.3% were assigned to K07124. By contrast, the remaining  
217 UniProt annotated genes exhibited rather low consistency with the KEGG online results. For example, genes annotated to *baiF*  
218 (K15871, EC 3.1.2.26, bile acid-CoA hydrolase) by UniProt were largely assigned to K18702 (uctC; CoA:oxalate CoA-transferase  
219 [EC:2.8.3.19], 43.4%), K07749 (frc; formyl-CoA transferase [EC:2.8.3.16], 31.0%) and K08298 (caiB; L-carnitine CoA-transferase  
220 [EC:2.8.3.21], 13.3%) by KEGG. For genes annotated to *baiA* (K15869, EC 1.1.1.395, 3α-hydroxy bile acid-CoA-ester  
221 3-dehydrogenase) by UniProt, more than 80% of the genes were assigned to K00059 (abG; 3-oxoacyl-[acyl-carrier protein] reductase  
222 [EC:1.1.1.100]) by KEGG. There are several possibilities explaining the inconsistency between the two methods. First, the high  
223 sequence identity between target KOs (enzymes) and other KOs (enzymes). For example, the KEGG annotated CoA-transferases  
224 exhibit very high identity with bile acid-CoA hydrolase. The protein sequence A0A0S2W5Y8 (EC2.8.3.16, K07749) exhibits 99.7%  
225 identity with sequence A0A1C6GV35 (EC 3.1.2.26, bile acid-CoA hydrolase); the sequence F7UY98 (K08298) exhibits 92.3%

226 identity with sequence T4BVW9 (EC 3.1.2.26, bile acid-CoA hydrolase). Second, there are differences between the two annotation  
227 algorithms. For example, the gene encoding protein sequence 1 (ID: V1.CD3-0-PN\_GL0121220) is annotated to *baiA* ((K15869) by  
228 UniProt but assigned to K00059 by KEGG, although protein sequence 1 exhibits higher identity (87%) with ag:ACF20977 (K15869)  
229 than with sequences from K00059 (**Supplementary Data 5**). Finally, the inconsistency could be also caused by unique protein  
230 sequences in the two databases. For instance, 12 of 13 genes annotated to *7 $\beta$ -hsdh* (7-beta-hydroxysteroid dehydrogenase, EC  
231 1.1.1.201) are assigned to K07124 by KEGG. The protein sequences encoded by these genes exhibit more than 70% identity with  
232 R9UAM1 (7-beta-hydroxysteroid dehydrogenase, EC 1.1.1.201), and less than 40% identity with sequences from K07124  
233 (**Supplementary Data 6**).

234 To further validate the annotation of genes involved in bile acid metabolism, we searched the 16,102 genes against the entire UniProt  
235 database (Release 2017\_07 of 05-Jul-2017) and calculated the percentage of genes with the best-scoring hits assigned to the same BA  
236 metabolism functions/enzymes identified in the initial search against the 1,011 amino acid sequences annotated as enzymes involved in  
237 BA metabolism in the UniProt database (**Supplementary Data 7**). Due to the multiple submitted names of the same gene or protein and  
238 the existence of a massive number of uncharacterized proteins in UniProt, we combined the different synonymous protein names for  
239 each BA metabolism function and removed the best scoring uncharacterized proteins.

240 For *bsh*, *baiE*, *baiG*, *baiI* and *7 $\beta$ -hsdh* genes, the annotation of the highest scoring UniProt hits representing more than 85% of the genes  
241 was consistent with the annotations by searching against only the 1,011 amino acid sequences from UniProt database. These results

242 demonstrated the robustness of the annotation of these genes. However, for *baiF*, *baiCD*, *baiB*, *baiH*, *baiA* and *7 $\alpha$ -hsdh*, their highest  
243 scoring UniProt hits were still largely assigned to non-BA metabolism functions.

244 Thus, although E value cutoff (E value > 1E -5)<sup>2</sup> and bit score cutoff (Score > 60)<sup>3,4</sup> have been widely used for metagenomic functional  
245 annotation in previously published studies, our analyses clearly reveal the limitations to distinguish different enzymes/functions with  
246 high sequence identity. Accordingly, in the present study only genes exhibiting highly consistent annotation (*bsh*, *baiE*, *baiG*, *baiI* and  
247 *7 $\beta$ -hsdh*) have been included in the analyses.

248

#### 249 **Supplementary References**

250

- 251 1. Harrington J, Fitzgerald AP, Layte R, Lutomski J, Molcho M, Perry IJ. Sociodemographic, health and lifestyle predictors of poor diets. *Public Health*  
252 *Nutr* **14**, 2166-2175 (2011).
- 253 2. Tremaroli V, *et al.* Roux-en-Y Gastric Bypass and Vertical Banded Gastroplasty Induce Long-Term Changes on the Human Gut Microbiome  
254 Contributing to Fat Mass Regulation. *Cell metabolism* **22**, 228-238 (2015).
- 255 3. Harrington ED, *et al.* Quantitative assessment of protein function prediction from metagenomics shotgun sequences. *Proceedings of the National*  
256 *Academy of Sciences of the United States of America* **104**, 13913-13918 (2007).
- 257 4. Tringe SG, *et al.* Comparative metagenomics of microbial communities. *Science* **308**, 554-557 (2005).
- 258 5. Kanehisa M, Sato Y, Morishima K. BlastKOALA and GhostKOALA: KEGG Tools for Functional Characterization of Genome and Metagenome  
259 Sequences. *J Mol Biol* **428**, 726-731 (2016).
- 260
- 261
- 262
- 263
- 264
- 265
